23 Discussion: 1471/1500

24

25 **Conflict of Interest Statement:**

26 The authors declare no competing financial interests.

27

28 **Acknowledgments:**

29 This material was supported in part by the Department of Veterans Affairs,  
30 Veterans Health Administration, Office of Research and Development, Biomedical  
31 Laboratory Research and Development Merit Review Award I01-BX002949 (ES), a  
32 Department of Defense CDMRP Award W81XWH-18-1-0598 (ES), NIH T32NS007466  
33 (KAB), NIH R01-NS080979 (GLW), NINDS 1R21NS102948 (IK/ES), NIH  
34 P30NS061800 (Dr. Sue Aicher), and OHSU Innovation Fund (ES) awards. The electron  
35 microscope was purchased with funds from the Murdock Charitable Trust awarded to Dr.  
36 Aicher.

37 We thank Dr. Stefanie Kaech-Petrie of the OHSU Advanced Light Microscopy  
38 Core for assistance with imaging; Dr. Gail Mandel and Dr. John Sinnamon for expertise  
39 and use of laser capture equipment; the OHSU Gene Profiling/RNA and DNA Services  
40 Shared Resource for support with qPCR experiments; and Dr. Sue Aicher, James Carroll,  
41 and Jo Hill for the electron microscopy expertise. We would like to acknowledge Drs.  
42 Sergey Ivanov and Lino Tessarollo for generously providing the *Cacna2d2* knockout  
43 mice; Drs. Michael Häusser and Arnd Roth for necessary files and permission to use the  
44 NEURON model; and research associates Arielle Isakharov and Ada Zhang for

45 outstanding technical support. We also thank Dr. Christopher Vaaga and Dr. Laurence  
46 Trussell for constructive comments on the manuscript. The contents of this manuscript do  
47 not represent the views of the U.S. Department of Veterans Affairs or the United States  
48 Government.  
49

## 50 **Abstract**

51  $\alpha 2\delta$  proteins (*Cacna2d1-4*) are auxiliary subunits of voltage-dependent calcium  
52 channels that also drive synapse formation and maturation. Because cerebellar Purkinje  
53 cells (PCs) only express one isoform of this family,  $\alpha 2\delta$ -2 (*Cacna2d2*), we used PCs as a  
54 model system to examine roles of  $\alpha 2\delta$  in excitatory synaptic function in a *Cacna2d2*  
55 knockout mouse. Whole-cell recordings of PCs from acute cerebellar slices revealed  
56 altered climbing fiber (CF)-evoked complex spike generation, as well as increased  
57 amplitude and faster decay of CF-evoked excitatory postsynaptic currents (EPSCs). CF  
58 terminals in the KO were localized more proximally on PC dendrites, as indicated by  
59 VGLUT2<sup>+</sup> immunoreactive puncta, and computational modeling demonstrated that the  
60 increased EPSC amplitude can be partly attributed to the more proximal location of CF  
61 terminals. In addition, CFs in KO mice exhibited increased multivesicular transmission,  
62 corresponding to greater sustained responses during repetitive stimulation, despite a  
63 reduction in the measured probability of release. Electron microscopy demonstrated that  
64 mutant CF terminals had twice as many vesicle release sites, providing a morphologic  
65 explanation for the enhanced glutamate release. Though KO CFs evoked larger amplitude  
66 EPSCs, the charge transfer was the same as wildtype as a result of increased glutamate  
67 re-uptake, producing faster decay kinetics. Together, the larger, faster EPSCs in the KO  
68 explain the altered complex spike responses, which degrade information transfer from  
69 PCs and likely contribute to ataxia in *Cacna2d2* KO mice. Our results also illustrate the  
70 multidimensional synaptic roles of  $\alpha 2\delta$  proteins.

71

## 72 **Significance Statement**

73  $\alpha 2\delta$  proteins (*Cacna2d1-4*) regulate synaptic transmission and synaptogenesis, but  
74 co-expression of multiple  $\alpha 2\delta$  isoforms has obscured a clear understanding of how  
75 various  $\alpha 2\delta$  proteins control synaptic function. We focused on roles of the  $\alpha 2\delta$ -2 protein  
76 (*Cacna2d2*), whose deletion causes cerebellar ataxia and epilepsy in mice and humans.  
77 Because cerebellar Purkinje cells only expresses this single isoform, we studied  
78 excitatory climbing fiber synaptic function onto Purkinje cells in *Cacna2d2* knockout  
79 mice. Using optical and electrophysiological analysis, we provide a detailed description  
80 of the changes in Purkinje cells lacking  $\alpha 2\delta$ -2, and provide a comprehensive mechanistic  
81 explanation for how functional synaptic phenotypes contribute to the altered cerebellar  
82 output.

83

## 84 **Introduction**

85 Synapses are indispensable to neural circuit function, yet our understanding of  
86 synapse formation and physiology in health and neurological disease is incomplete.  
87 Recently,  $\alpha 2\delta$  proteins (*Cacna2d1-4*) have been recognized as important regulators of  
88 synapse formation and plasticity (Dolphin, 2012). In addition to their roles in synaptic  
89 transmission as auxiliary subunits of voltage-dependent calcium channels (VDCCs)  
90 (Canti et al., 2005; Hoppa et al., 2012), these proteins have multiple postsynaptic roles in  
91 driving synapse formation, trans-synaptic communication, and glutamate receptor  
92 function (Eroglu et al., 2009; Kurshan et al., 2009; Fell et al., 2016; Wang et al., 2016;  
93 Brockhaus et al., 2018; Chen et al., 2018; Geisler et al., 2019). Mutations in human  $\alpha 2\delta$   
94 genes have been associated with epilepsy, movement disorders, and schizophrenia

95 (Edvardson et al., 2013; Pippucci et al., 2013), and  $\alpha 2\delta$ -1/2 proteins are the primary  
96 targets of the widely prescribed antiepileptic and analgesic, gabapentin (Gee et al., 1996;  
97 Brown and Gee, 1998; Boning Gao, 2000). However, the roles of  $\alpha 2\delta$  proteins in  
98 controlling synaptic and network function at any given synapse are still elusive, due in  
99 part to expression of multiple isoforms in many neurons.

100 Purkinje cells (PCs), the primary output pathway from the cerebellar cortex,  
101 exclusively and abundantly express the  $\alpha 2\delta$ -2 isoform (*Cacna2d2*) (Barclay et al., 2001a;  
102 Cole et al., 2005; Lein et al., 2007; Dolphin, 2012), thus providing an opportunity to  
103 determine how this protein contributes to synaptic transmission. Like the spontaneous  
104 ‘ducky’ mouse mutants (*du<sup>2j</sup>/du<sup>2j</sup>* or *du/du*), targeted deletion of  $\alpha 2\delta$ -2 causes cerebellar  
105 ataxia, epilepsy and premature death (Barclay et al., 2001b; Brodbeck et al., 2002; Ivanov  
106 et al., 2004; Donato et al., 2006), indicative of its importance in neurological function.

107 The global loss of  $\alpha 2\delta$ -2 likely impacts synapses throughout the brain. However,  
108 the climbing fiber (CF) to PC synapse has multiple distinctive features, including the  
109 mono-innervation of mature PCs by a single CF (Hashimoto et al., 2009) and presynaptic  
110 expression of vesicular glutamate transporter 2 (VGLUT2), allowing for the visualization  
111 of CF terminals and making this an ideal site to determine how  $\alpha 2\delta$ -2 contributes to  
112 synaptic function. In contrast to Purkinje cells, the inferior olivary cells (from which CFs  
113 arise) predominantly express the  $\alpha 2\delta$ -1 isoform, with low expression of  $\alpha 2\delta$ -2/3 isoforms  
114 (Cole et al., 2005; Lein et al., 2007). Finally, CF activity drives complex spike (CpS)  
115 generation in PCs, which produces a high-fidelity error prediction signal important to the  
116 processing of motor coordination and learning (Yang and Lisberger, 2014; Heffley et al.,  
117 2018).

118 We combined structural and electrophysiological analysis of the CF to PC  
119 synapse in *Cacna2d2* knockout mice (Ivanov et al., 2004) to elucidate the contribution of  
120  $\alpha 2\delta$ -2 to excitatory synapse formation and transmission. Contrary to positive regulation  
121 of excitatory synaptogenesis by the  $\alpha 2\delta$ -1 isoform (Li et al., 2004; Eroglu et al., 2009;  
122 Chen et al., 2018; Risher et al., 2018), loss of  $\alpha 2\delta$ -2 increased functional synaptic  
123 innervation by CFs.  $\alpha 2\delta$ -2 KO CFs had elevated glutamate release and clearance  
124 compared to WT, resulting in profound deficiencies in the generation of CpS spikelets.  
125 Together, our studies demonstrate the critical role of  $\alpha 2\delta$ -2 in proper CF-PC synapse  
126 organization and network function, and allude to the wide versatility of  $\alpha 2\delta$  proteins in  
127 synaptic transmission.

128

## 129 **Materials & Methods**

130 Animals: *Cacna2d2* knockout mice (*Cacna2d2*<sup>tm1Svi</sup>, MGI = 3055290; generously  
131 supplied by Drs. Sergey Ivanov and Lino Tessarollo) were obtained as cryopreserved  
132 sperm and re-derived via *in vitro* fertilization on a C57B/6J background. Breeding mice  
133 were kept heterozygous, and genotyping was performed using the following primers:  
134 forward 5'-ACTGGTGGGCATCTTACAGC-3', reverse mutant 5' -  
135 AAAGAACGGAGCCGGTTG-3', reverse wildtype 5'-  
136 TGTTAGCGGGGAGGTCACCTA- 3'. This produced a ~700 bp product from the  
137 wildtype allele and a ~550 bp product from the mutant allele. Mice were born in the  
138 Mendelian ratio of 1:2:1; with WT mice having two copies of the intact *Cacna2d2* gene,  
139 and KO mice as homozygous mutants. Because ~50% of KO mice die prematurely

140 (Ivanov et al., 2004), all experiments used male and female mice between p21-p30, when  
141 CF-PC synapses have reached maturity, but before significant loss of KO mice.  
142 *Cacna2d2* deletion was validated, and *Cacna2d* isoform abundance were  
143 measured, using quantitative PCR from fresh-frozen tissues. Regions of the inferior olive  
144 (IO) and the Purkinje cell layer (PCL), including the proximal molecular layer, were  
145 microdissected by laser capture for pre- vs. postsynaptic comparative analysis. Briefly,  
146 mice were deeply anesthetized by inhalation of 4% isoflurane followed by injection of  
147 0.8 ml of 2% avertin i.p. (Sigma-Aldrich) and rapidly decapitated. Brains were rapidly  
148 dissected, mounted in OCT medium (Tissue-Tek) on dry ice, and placed at -20°C for  
149 cryosectioning. 25 µm coronal sections from cerebellum and brainstem were collected on  
150 RNase-treated PEN membrane slides (Zeiss). Slides were then dehydrated through a  
151 succession of EtOH rinses (70% EtOH 30 seconds, 100% EtOH 30 seconds), and nuclei  
152 stained using 1 mg/mL Cresyl Violet in 100% EtOH (1 minute). IO and PCL regions  
153 were identified based on anatomic criteria, and isolated using laser microdissection  
154 (Zeiss). Samples were resuspended in 20 µl QIAzol Lysis Reagent (Qiagen) for 20  
155 minutes at RT and stored at -80°C. RNA isolation and qPCR were performed by the  
156 Oregon Health & Science University Gene Profiling/RNA and DNA Services Shared  
157 Resource. In brief, RNA was isolated using the Trizol/RNeasy hybrid protocol with  
158 QIAcube automation. SuperScript™ IV VILO™ Master Mix (Invitrogen) was used for  
159 reverse transcription with 636 pg of input RNA per 20 µl reaction. Following reverse  
160 transcription, cDNA was quantified and normalized for 7500ng of cDNA input for pre-  
161 amplification in 14 PCR cycles. A 1:4 dilution of the pre-amp reaction was used as input  
162 for qPCR. The TaqMan Universal master mix (Life Technologies) was used for the PCR



163 reaction, using a single master mix per TaqMan probe set for *Cacna2d1*  
164 (Mm00486607\_m1), *Cacna2d2* (Mm01230564\_g1), *Cacna2d3* (Mm00486641\_m1),  
165 *Cacna2d4* (Mm01190080\_m1), and *ACTB* (Mm04394036\_g1) as the endogenous  
166 control. Data were acquired using Applied Biosystems QuantStudio 12K Flex Software  
167 v1.2.2 (Life Technologies) with settings set to default. Measurements are reported as  
168 either  $\Delta Ct$  values (difference in cycle time for gene of interest relative to *ACTB*, in which  
169 a higher  $\Delta Ct$  indicates lower relative expression) or mean fold difference, as determined  
170 by  $2^{-(Ct_{\text{target}} - Ct_{\text{ACTB target}}) - (Ct_{\text{reference}} - Ct_{\text{ACTB reference}})} \pm \text{SEM}$ .

171 Mice were maintained in facilities fully accredited by the Association for  
172 Assessment and Accreditation of Laboratory Animal Care and veterinary care was  
173 provided by Oregon Health & Science University's Department of Comparative  
174 Medicine. All animal care and experiments were performed in accordance with state and  
175 federal guidelines, and all protocols were approved by the OHSU Institutional Animal  
176 Care and Use Committee.

177

178 Immunohistochemistry: Following deep anesthesia as described above, p21 *Cacna2d2*  
179 KO and WT littermates were transcardially perfused with 5 ml phosphate-buffered saline  
180 (PBS) followed by 4% paraformaldehyde-PBS (PFA-PBS). Mice were decapitated, and  
181 brains were removed and post-fixed for 24 hrs. in 4% PFA-PBS. Cerebella were cut in  
182 sagittal sections at 50  $\mu\text{m}$  on a vibratome and stored in PBS at 4°C. Sections containing  
183 vermis lobe VI were permeabilized with 0.4% Triton-PBS containing 10% normal goat  
184 serum for 1 hr at room temperature, then stained with mouse anti-Calbindin 1:20  
185 (Neuromab #73-452) and guinea pig anti-VGLUT2 1:200 (Synaptic Systems #135404) at

186 4°C overnight. After rinsing, corresponding fluorescently-labeled secondaries  
187 (Invitrogen) were applied at 1:400 and glass coverslips were mounted on glass slides with  
188 Fluoromount G (Sigma-Aldrich).

189 To image VGLUT2<sup>+</sup> synapses, 6 μm z-stack images from the vermis lobe VI were  
190 acquired at 0.2 μm intervals with a Zeiss LSM780 laser scanning confocal microscope at  
191 40x magnification and 1024 x 1024 pixel density using ZEN software. This produced  
192 images of the entire thickness of the molecular layer, including the PC somata. Images  
193 were then analyzed in FIJI/ImageJ. VGLUT2<sup>+</sup> puncta distribution/density were quantified  
194 from maximum projection images as distinct VGLUT2<sup>+</sup> puncta of at least 0.2 μm<sup>2</sup>, after  
195 subtracting the background for increased contrast. For each punctum, the y-distance from  
196 the top of the PC layer to the terminal was measured. Per image, a minimum of 100 μm  
197 of linear PC layer was quantified. VGLUT2<sup>+</sup> puncta distributions were then binned into  
198 10 μm distances. VGLUT2<sup>+</sup> puncta size and a second measure of density (from whole  
199 volume of tissue) were calculated using a masking feature in FIJI/ImageJ that captures  
200 puncta between 0.1-5μm<sup>2</sup>, and this was normalized to the length of PCL imaged to  
201 produce a measure of density per μm of PCL. Punctum distribution, density and size data  
202 were averaged from 2-3 sections/animal, using 5-6 animals of each genotype. Slides were  
203 coded prior to imaging, and image acquisition and analysis were performed by  
204 investigators blinded to genotype. Sections were stained side-by-side with the same  
205 antibody mixtures, and imaging parameters were kept constant between samples.

206

207 Slice Preparation and Electrophysiology: KO or WT littermates were deeply anesthetized  
208 as described above, and transcardially perfused with ice-cold sucrose-based solution

209 containing (mM): 87 NaCl, 2.5 KCl, 1.25NaH<sub>2</sub>PO<sub>4</sub>, 0.4 ascorbate, 2 Na pyruvate, 25 D-  
210 glucose, 25 NaHCO<sub>3</sub>, 75 Sucrose, 7 MgCl<sub>2</sub>, 0.5 CaCl<sub>2</sub> (osmolarity adjusted to 300-305  
211 mOsm) and equilibrated with 95% O<sub>2</sub> and 5% CO<sub>2</sub> gas mixture. Acute 300 μm sagittal  
212 slices were cut from cerebellum using a vibratome (VT1200, Leica Microsystems), and  
213 incubated for 30 minutes in standard artificial cerebral spinal fluid (aCSF) at 34°C.

214 Whole-cell recordings were obtained using 1-3 MΩ borosilicate glass pipettes  
215 filled with either K-gluconate or CsCl<sub>2</sub>-based internal solution. For current clamp  
216 experiments, internal solution contained (in mM): 135 K-gluconate, 10 HEPES, 10 NaCl,  
217 1 MgCl<sub>2</sub>, 0.1 BAPTA, 0.1 CaCl<sub>2</sub>, 2 ATP-Mg, and 10 phosphocreatine, pH 7.28 adjusted  
218 with KOH (osmolarity adjusted to 289 mOsm). For voltage clamp recordings, the internal  
219 solution contained (in mM): 100 CsMeSO<sub>4</sub>, 35 CsCl, 15 TEA-Cl, 1 MgCl<sub>2</sub>, 15 HEPES,  
220 0.2 EGTA, 2 ATP-Mg, 0.3 TrisGTP, 10 phosphocreatine, and 2 QX-314, pH 7.3 adjusted  
221 with CsOH (osmolarity adjusted to 295 mOsm). External solution contained (in mM):  
222 125 NaCl, 25 NaHCO<sub>3</sub>, 1.25 NaH<sub>2</sub>PO<sub>4</sub>, 3 KCl, 25 Dextrose, 2 CaCl<sub>2</sub>, 1 MgCl<sub>2</sub>  
223 (osmolarity adjusted to 300 mOsm) and was continuously perfused via roller pump.

224 PCs from the vermis, lobe VI, were identified by soma size and location in the PC  
225 layer using live infrared differential contrast microscopy on an upright Olympus  
226 microscope. Inhibition was blocked in all experiments by 10 μM SR95531 (Tocris).  
227 Whole-cell patch-clamp recordings were obtained in voltage clamp mode with cell  
228 capacitance, series resistance and input resistance monitored in real time using  
229 intermittent -10 mV voltage steps. Signals were amplified with a MultiClamp 700B  
230 (Molecular Devices) amplifier and pipette capacitance was compensated for using  
231 MultiClamp software. Signals were low-pass filtered at 6 kHz and sampled at 10 kHz,

232 and digitized with a National Instruments analog-to-digital board. All recordings were  
233 acquired and analyzed using IgorPro-based (Wavemetrics) software. All recordings were  
234 performed at room temperature.

235 Climbing fiber-mediated excitatory postsynaptic currents (EPSCs) were evoked  
236 using theta or monopolar glass electrode stimulation in the granule cell layer (0.1 ms, 0-  
237 100 V square pulses; 0.1 or 0.05 Hz stimulation frequency), placed  $\sim 50$   $\mu\text{m}$  from the PC,  
238 and the stimulation electrode position was adjusted as needed to obtain a CF response.  
239 CF responses were identified as large all-or-none EPSCs that appeared during  
240 incremental increases in stimulation intensity, with paired-pulse depression when  
241 stimulated with 2 pulses 50 ms apart. All cells were first recorded in voltage clamp mode,  
242 where a hyperpolarizing step of -10 mV was applied to monitor cell capacitance, series  
243 resistance and input resistance. Series resistance was not compensated; cells with series  
244 resistance  $>10$   $\text{M}\Omega$ , or a  $>2$   $\text{M}\Omega$  change in series resistance over the course of the  
245 experiment, were excluded.

246 For current clamp experiments, PC resting membrane potential was measured by  
247 holding the cell in zero current mode, then a small amount of bias current (approximately  
248 -130 pA) was injected to keep the cell near -60 mV for complex spike and current step  
249 experiments. Bridge balance was applied to compensate for pipette and series resistance  
250 throughout the recording. First, CFs were stimulated at 0.1 Hz and 10 consecutive sweeps  
251 of evoked complex spikes were recorded. Then with CF stimulation off, 500 ms steps of  
252 current injection from -200 pA– 1 nA were delivered at least 5 times per step. Cells were  
253 returned to voltage clamp mode to assess recording stability. For complex spike analysis,  
254 sweeps were averaged to measure the initial spike amplitude and rise rate. Spikelets were

255 classified as rapid depolarizations ( $>1000$  V/s) that reached +20 mV from baseline, from  
256 which spikelet trough-to-peak amplitudes were measured. Area under the curve was  
257 measured by integrating the trace during the first 100 ms following stimulation.

258 For most voltage clamp experiments, cells were held at -70 mV in the presence of  
259 0.5  $\mu$ M NBQX (Tocris) to maintain voltage clamp during CF EPSCs. Brief  
260 hyperpolarizing steps (-10 mV) were delivered to monitor PC access and input resistance  
261 preceding each CF-evoked EPSC. 10 CF EPSC trials were averaged, and these averages  
262 were used to determine peak amplitude, 20-80% rise time and tau of decay (from single-  
263 exponential fits of the EPSC decay). Then, ten paired-pulse responses with an inter-  
264 stimulus interval of 50 ms were collected, followed by 10 Hz trains of CF stimulation or  
265 drug wash-in experiments. For DL-TBOA experiments, baseline EPSCs were acquired at  
266 0.05 Hz before 50  $\mu$ M DL-TBOA (Tocris) was added to the bath. For kynurenic acid  
267 (KYN) experiments, aCSF excluded NBQX and PCs were held at -20 mV to maintain  
268 voltage-clamp during 0.1 Hz CF stimulation. After acquiring baseline EPSCs, 1 mM  
269 KYN (Sigma-Aldrich) was added to the perfusate. Quantification of EPSC peak  
270 amplitude and tau of decay from drug wash-in experiments used averages from 10  
271 sweeps prior to wash-on compared to 10 sweeps after 10 minutes of exposure to drug  
272 (For KYN effect:  $(EPSC_{Control} - EPSC_{KYN}) * 100$ ; For TBOA effect:  $(\tau_{TBOA} - \tau_{Control}) * 100$ ).  
273 For asynchronous EPSC (aEPSC) experiments, aCSF was composed of 1.3 mM  
274  $Sr^{2+}$  in replacement of  $Ca^{2+}$ , 3.3 mM  $Mg^{2+}$ , and NBQX was omitted. PCs were held at -70  
275 mV and CFs were stimulated at 0.05 Hz. ~10 trials were used for quantification of  
276 aEPSCs, which were sampled from a 500 ms window starting at 150 ms from CF  
277 stimulation, and selected manually. For data presentation, aEPSC traces were off-line

278 box-filtered at 1 kHz. To estimate the readily releasable pool, cumulative CF response  
279 amplitudes were plotted, and the last third of the train was fit with a linear regression that  
280 was extrapolated to time 0 (Schneggenburger et al., 1999).

281

282 NEURON Computational PC Model: CF simulations were performed with NEURON  
283 version 7.7.0, using source code generously supplied by Dr. Michael Häusser (Roth and  
284 Häusser, 2001). The following model parameters were kept constant across all  
285 simulations:  $R_m = 120.2 \text{ k}\Omega\text{cm}^2$ ,  $C_m = 0.64 \text{ }\mu\text{F}/\text{cm}^2$  and a residual uncompensated series  
286 resistance of 1 M $\Omega$ . Because the Model is based on recordings and dimensions of a p21  
287 rat PC (Roth and Häusser, 2001), we normalized our WT measurements for CF  
288 distribution to the model cell as control, and adjusted the dendritic innervation by KO  
289 CFs based on our VGLUT2<sup>+</sup> distribution as a relative decrease in length of coverage (i.e.  
290 0.7x CF length of control). CF EPSCs were simulated using 500 inputs of 1 nS peak  
291 conductance (simulated as the sum of two exponentials for rise and decay) with a reversal  
292 potential of 0 mV and a constant density per dendritic length distribution. Simulation  
293 time step was 10  $\mu\text{s}$  for integration. Waveforms were created in IgorPro8 from simulation  
294 output to measure EPSC decay time constants by fitting with a single exponential.

295

296 Transmission Electron Microscopy (TEM): Animals were deeply anesthetized with  
297 isoflurane and avertin, as described above, and then transcardially perfused with 10 ml  
298 ice-cold heparin (1k USP per ml; Novaplus) followed by freshly prepared 2%  
299 glutaraldehyde/2% paraformaldehyde in 0.1M PB solution filtered with #3 filter paper  
300 (VWR) and pH to 7.4. Brains were dissected, cerebella were blocked, and post-fixed for

301 30 minutes in 4% paraformaldehyde. Tissue was transferred to 0.1 M PB for storage at  
302 4°C and 40 µm sagittal slices of vermis lobe VI were made using a Leica microtome.  
303 Slices were collected in separate wells to assure TEM would be from slices >100 µm  
304 apart. PFA, Glutaraldehyde and microtome blades were all from Electron Microscopy  
305 Sciences (EMS).

306 Tissue samples were coded before processing for TEM by a blinded investigator.  
307 Briefly, sections were incubated in 1% osmium tetroxide in PB for 30 minutes,  
308 dehydrated through a graded series of ethanols, placed into propylene oxide for 30 min,  
309 and then placed in 1:1 propylene oxide:EMBed resin (EMS) rotating at room temperature  
310 overnight. Sections were then incubated in 100% resin for 2 hrs, embedded between  
311 sheets of Aclar plastic, and incubated at 60°C for 48 hrs. Cerebellum sections were then  
312 glued to resin blocks and ultrathin sections (50 nm) were collected onto 400 mesh copper  
313 grids (EMS). The ultrathin sections were then counterstained with uranyl acetate and  
314 Reynolds lead citrate and examined using a FEI Tecnai 12 electron microscope  
315 (Hillsboro, OR) and images were captured using an Advanced Microscopy Techniques  
316 digital camera.

317 CF terminals were imaged from the most highly innervated region of the  
318 molecular layer (20-60 µm from PC somata) and identified at 6800x magnification by the  
319 following criteria: proximity (<3 µm) to PC primary dendrites, dense-packing of round  
320 vesicles, and when synaptic contacts were present, asymmetric Gray's type-1 excitatory  
321 synaptic markers. Images were taken at 18500x magnification and CF terminals with  
322 clearly delineated membranes that met the criteria described above were analyzed using  
323 Fiji/ImageJ software by a separate blinded investigator. Terminal area, total SV density,

324 the length and number of synaptic contacts made by each terminal (as determined by the  
325 opposing postsynaptic density), as well as the number of SVs within 100 nm of each  
326 synaptic contact as a proxy for the readily releasable pool were measured. Quantifications  
327 from ~10-15 CF images/animal were averaged (n = animal).

328

329 Statistics: Data was tested for Gaussian distribution using the Kolmogorov-Smirnov  
330 normality test with Dallal-Wilkinson-Lilliefors P value. Differences between genotypes in  
331 VGLUT2<sup>+</sup> puncta distribution and TEM total synaptic contacts/terminal were tested for  
332 significance using Kolmogorov-Smirnov test. For other nonparametric data, the Mann-  
333 Whitney test was used (i.e. CpS spikelet number). Immunofluorescence, TEM, and  
334 electrophysiology data with normal distributions were analyzed using Student's t-tests.  
335 Normalized and cumulative amplitude responses during repetitive CF stimulation were  
336 compared between genotypes using Multiple t-tests with Holm-Sidak correction. For  
337 morphology data, multiple images per animal were averaged where n = # mice. For  
338 electrophysiology, all experiments utilized at least 4 animals per genotype, where n = #  
339 cells. Data were graphed in Prism GraphPad version 8 and are reported as the mean ±  
340 SEM. \*p<0.05, \*\*p<0.01, \*\*\*p<0.001, \*\*\*\*p<0.0001.

341

## 342 **Results**

### 343 **$\alpha 2\delta$ -2 controls Purkinje cell spiking patterns in response to climbing fiber activation**

344 To examine how the loss of  $\alpha 2\delta$ -2 affects cerebellar output, we performed whole-  
345 cell recordings from PCs in acutely prepared cerebellar slices from  $\alpha 2\delta$ -2 knockout (KO)  
346 mice and their wildtype (WT) littermates at p21-p30, after CF innervation has reached



347 maturity (Hashimoto et al., 2009). We focally stimulated CFs in the granule cell layer and  
348 unitary CF-mediated EPSCs were identified by their large amplitude, all-or-nothing  
349 nature and paired-pulse depression (Dittman and Regehr, 1998; Hashimoto and Kano,  
350 1998; Liu and Friel, 2008; Rudolph et al., 2011). CF-evoked CpSs were then recorded in  
351 current clamp mode.

352 The voltage envelope of CpS waveforms was comparable between WT and KO  
353 (**Figure 1A**; Integral of CpS between time 0 - 100 ms: WT =  $0.96 \pm 0.06 \text{ V} \cdot \text{s}$ ,  $n = 10$ ;  
354 KO =  $0.81 \pm 0.06 \text{ V} \cdot \text{s}$ ,  $n = 11$ ;  $p = 0.1$ ; unpaired Student's t-test), but the number of  
355 CpS spikelets was substantially reduced in KO PCs (**Figure 1B**; WT =  $3.2 \pm 0.5$ ,  $n = 10$ ;  
356 KO =  $1.2 \pm 0.4$ ,  $n = 11$ ;  $p = 0.002$ ; Mann-Whitney). In addition, the few spikelets that did  
357 occur during the KO CpS were of lower trough-to-peak amplitude. All first spikelets in  
358 the WT were  $>30 \text{ mV}$  compared to 75% in the KO (**Figure 1C**), which is consistent with  
359 a lower probability of CpS transmission (Khaliq and Raman, 2005) in the  $\alpha 2\delta$ -2 KO.  
360 Moreover, though subsequent spikelets were present in 2 of 11 KO cells, none reached 30  
361 mV trough-to-peak amplitude (Mean KO spikelet<sub>2</sub> =  $16.5 \pm 5.7 \text{ mV}$ ,  $n = 2$ ; spikelet<sub>3</sub> =  $7.6$   
362 mV,  $n = 1$ ; spikelet<sub>4</sub> =  $7.2 \text{ mV}$ ,  $n = 1$ ; spikelet<sub>5</sub> =  $6.5 \text{ mV}$ ,  $n = 1$ ). Despite the differences  
363 in CpS spikelet generation between genotypes, initial spike amplitudes (**Figure 1D**) and  
364 rise rates were unchanged between WT and KO (Spike slope: WT =  $1790 \pm 230 \text{ V/s}$ ,  $n =$   
365  $10$ ; KO =  $1660 \pm 240 \text{ V/s}$ ,  $n = 11$ ;  $p = 0.69$ ; unpaired Student's t-test).

366 The altered CpS in KO PCs were not associated with changes in the intrinsic  
367 excitability of  $\alpha 2\delta$ -2 KO PCs as measured by their resting membrane potentials (**Figure**  
368 **1E**), input resistance (WT  $140 \pm 20 \text{ M}\Omega$ ,  $n = 8$ ; KO  $122 \pm 7.8 \text{ M}\Omega$ ,  $n = 11$ ;  $p = 0.38$ ,  
369 unpaired Student's t-test), or response to current injection (**Figures 1F and 1G**). Thus, we

370 explored whether altered CpS patterns might represent differences in CF-mediated  
371 synaptic currents.

372

373  **$\alpha 2\delta$ -2 knockout mice have larger CF-evoked EPSCs with accelerated decay kinetics**

374 The kinetics of CF-evoked excitatory postsynaptic currents (EPSCs) influence the  
375 CpS shape, such that a slower EPSC decay increases the likelihood of spikelet generation  
376 (Rudolph et al., 2011). Spikelet generation is also sensitive to the peak synaptic  
377 conductance, as an increased phasic conductance can result in depolarization block and  
378 failure to generate spikelets (Davie et al., 2008). Thus, we performed whole-cell  
379 recordings of CF EPSCs in the presence of low concentrations of the  $\alpha$ -amino-3-hydroxy-  
380 5-methyl-4-isoxazolepropionic acid receptor (AMPA) antagonist, NBQX (0.5  $\mu$ M), to  
381 facilitate voltage clamp control (as in Dittman and Regehr, 1998; Liu and Friel, 2008;  
382 Rudolph et al., 2011).

383 Peak EPSC amplitudes were 37% larger in  $\alpha 2\delta$ -2 KO mice (**Figures 2A and 2B**;  
384 WT =  $703 \pm 63$  pA, n = 17; KO =  $961 \pm 86$  pA, n = 19, p = 0.03; unpaired Student's t-  
385 test). WT and KO EPSC decays were well-fit by a single exponential curve with KO  
386 EPSCs exhibiting faster decay kinetics (**Figures 2C and 2D**; WT  $\tau_{\text{decay}} = 20.6 \pm 1.1$  ms, n  
387 = 17; KO  $\tau_{\text{decay}} = 13.2 \pm 0.8$  ms, n = 20, p < 0.0001; unpaired Student's t-test). Despite  
388 these two alterations, the EPSC in the KO had an equivalent charge transfer to that of WT  
389 EPSCs (**Figures 2E**), and 20-80% risetimes were similar in WT and KO PCs (**Figures**  
390 **2F and 2G**).

391

392 **Proximal redistribution of CF synapses in the  $\alpha\delta$ -2 knockout partially contributes**  
393 **to larger CF-evoked EPSCs**

394 To examine the larger EPSC in KO mice, we isolated quantal events at CF  
395 synapses by desynchronizing CF evoked release. We replaced extracellular calcium with  
396 strontium (Rudolph et al., 2011; Zhang et al., 2015), and measured the amplitudes of CF-  
397 derived asynchronous quantal release events (aEPSCs). The average aEPSC was 24%  
398 larger in KO compared to WT PCs (**Figures 3A-C**; WT =  $25.6 \pm 1.0$  pA, n = 8; KO =  
399  $31.8 \pm 1.6$  pA, n = 8, p = 0.004; unpaired Student's t-test), indicating that part, but not all,  
400 of the increased CF-evoked EPSC amplitude could be accounted for by a larger unitary  
401 response.

402 Therefore, we asked whether there might also be an increase in the number of CF  
403 synapses onto PCs using an immunohistochemical approach. CF terminals can be  
404 selectively identified as discrete puncta along the primary dendrites of PCs through their  
405 expression of VGLUT2 (Miyazaki et al., 2004; Zhang et al., 2015). As is apparent in  
406 **Figure 4A**, VGLUT2<sup>+</sup> puncta were closer to PC somata in KO mice than in WT. CF  
407 terminals were a mean distance of  $40.8 \pm 0.5$   $\mu$ m from the PC soma in WT, whereas  $\alpha\delta$ -  
408 2 KO mice had a mean CF terminal distance of  $30.6 \pm 0.3$   $\mu$ m (**Figures 4A and 4C**; n =  
409 3-5 images from 5 mice of each genotype; p < 0.0001; Kolmogorov-Smirnov test).  
410 Moreover, distal CF innervation (beyond 50  $\mu$ m from the PC soma; **Figure 4B**)  
411 accounted for 23% of puncta in WT, but only 6% in KO. This shift in CF terminal  
412 distribution in KO animals was not associated with a change in VGLUT2<sup>+</sup> puncta size  
413 (**Figure 4D**) or overall number of puncta within the molecular layer (**Figure 4E**; Mean  
414 number of puncta normalized to length of PCL: WT =  $1.91 \pm 0.21$  puncta/ $\mu$ m<sub>PCL</sub>; KO =

415  $1.81 \pm 0.14$  puncta/ $\mu\text{m}_{\text{PCL}}$ ,  $n = 3$ -5 images from 5 mice of each genotype;  $p = 0.7$ ;  
416 unpaired Student's t-test). There was no change in the molecular layer width, and the  
417 density of PCs was unchanged (Mean molecular layer width; WT =  $110 \pm 3.8$   $\mu\text{m}$ ; KO =  
418  $106 \pm 4.8$   $\mu\text{m}$ ,  $p = 0.43$ ; Mean PC density; WT =  $0.62 \pm 0.08$  cells/ $\mu\text{m}_{\text{PCL}}$ ; KO =  $0.65 \pm$   
419  $0.06$  cells/ $\mu\text{m}_{\text{PCL}}$ ,  $p = 0.72$ ;  $n = 8$  images from 3 mice of each genotype; unpaired  
420 Student's t-test).

421       The more proximal location of CF inputs in the KO could contribute to both the  
422 increased EPSC amplitude and decay rate, due to decreased dendritic filtering (Roth and  
423 Häusser, 2001). To ask whether changes in CF synapse localization alone were sufficient  
424 to account for the altered EPSC amplitude and kinetics, we modified the Roth and  
425 Häusser (2001) computational model of dendritic integration of CF inputs onto PCs to  
426 match our data. This model, based on morphological reconstructions of single PCs and  
427 empirical measurements of dendritic filtering (Roth and Häusser, 2001), allowed us to  
428 simulate how redistribution of CF inputs would affect the ensemble CF EPSC. Using this  
429 model (**Figures 5A**; For KO, "Model CF<sub>70% Control</sub>" simulates the empirically observed  
430 VGLUT2<sup>+</sup> distribution from **Figure 4C**), a shift from the WT to the KO distribution of  
431 CF inputs produced a 16% increase in simulated EPSC amplitude and a 15% decrease in  
432 the decay time constant (**Figures 5B**). Thus, the proximal distribution of CF inputs in the  
433 KO augment the quantal response (**Figure 5C**), to account for the increase in evoked CF  
434 EPSC amplitude.

435

436 **Increased multivesicular release from  $\alpha 2\delta$ -2 knockout CFs**

437 CF synapses exhibit multivesicular release, increasing the synaptic glutamate  
438 concentration (Wadiche and Jahr, 2001; Rudolph et al., 2011). To determine whether KO  
439 mice displayed altered multivesicular release, we used the low affinity, competitive  
440 AMPAR antagonist, kynurenic acid (KYN), to assay synaptic glutamate concentrations.  
441 Because KYN binds and unbinds AMPARs throughout the duration of the CF-evoked  
442 glutamate transient, KYN inhibition of the AMPAR-mediated current is inversely  
443 proportional to the concentration of glutamate present at postsynaptic receptors (Wadiche  
444 and Jahr, 2001). KYN (1 $\mu$ M) inhibited WT EPSC peak amplitudes by 65% (**Figures 6A**  
445 **and 6B**; EPSC<sub>Peak</sub> amplitude control vs. KYN; WT<sub>Control</sub> = 1.77  $\pm$  0.41 nA vs. WT<sub>KYN</sub> =  
446 0.62  $\pm$  0.16 nA, n = 6, p = 0.007; paired Student's t-test), whereas KO EPSCs were  
447 inhibited by only 40% (EPSC<sub>Peak</sub> amplitude control vs. KYN; KO<sub>Control</sub> = 2.63  $\pm$  0.31 nA  
448 vs. KO<sub>KYN</sub> = 1.57  $\pm$  0.21 nA, n = 8, p = 0.0009; paired Student's t-test; relative change in  
449 WT vs. KO, p = 0.001; unpaired Student's t-test), demonstrating enhanced multivesicular  
450 release from KO CFs.

451 For these experiments, PCs were held at -20 mV to maintain voltage clamp of the  
452 CF-evoked EPSC (Harrison and Jahr, 2003; Rudolph et al., 2011) and NBQX was  
453 omitted because co-application of NBQX and KYN facilitates AMPAR-mediated  
454 responses (Prescott et al., 2006). Interestingly, at this holding potential, KO EPSCs  
455 exhibited slower decay kinetics (For  $\tau_{decay}$  at baseline  $V_m$  = -20 mV; WT<sub>-20mV</sub> = 11.6  $\pm$   
456 1.12 ms, n = 6; KO<sub>-20mV</sub> = 18.5  $\pm$  1.32 ms, n = 8, p = 0.002; unpaired Student's t-test).  
457 Although this is consistent with a larger glutamate transient due to multivesicular release  
458 (Paukert et al., 2010), it is in apparent odds with the faster decay kinetics in KO PCs at  
459 more hyperpolarized potentials. One explanation for this discrepancy in decay kinetics

460 could be the voltage-dependence of glutamate re-uptake by PCs. PCs and surrounding  
461 Bergmann glia express high levels of glutamate transporters to manage spillover and  
462 glutamate clearance, and activity of these transporters shapes the CF-evoked EPSC  
463 waveform (Paukert et al., 2010). However, PCs play a dominant role in synaptic  
464 glutamate clearance (Auger and Attwell, 2000), and glutamate transporters have  
465 decreased efficiency at depolarized voltages (Bergles et al., 1997). In this scenario, the  
466 contributions of PC and Bergmann glia glutamate transporters together result in rapid  
467 EPSC decay in the KO at hyperpolarized potentials, but prolonged decay expected from  
468 multivesicular release dominates the EPSC waveform when KO PCs are held at  
469 depolarized potentials.

470

#### 471 **Faster EPSC decay in $\alpha\delta$ -2 knockout due to enhanced glutamate clearance**

472 We further investigated the role of glutamate transporters in shaping the CF EPSC  
473 waveform in WT and KO mice while holding PCs at -70 mV in the presence of low  
474 NBQX (0.5  $\mu$ M), as in our prior voltage clamp experiments (**Figure 2**). Block of  
475 glutamate transporters with the non-selective transport re-uptake inhibitor, DL-TBOA (50  
476  $\mu$ M), increased WT decay constants by ~30% (similar to Rudolph et al., 2011) (**Figure**  
477 **6C**; WT  $\tau_{\text{decay}}$  control vs. TBOA; WT<sub>Control</sub> =  $13.6 \pm 0.9$  ms vs. WT<sub>TBOA</sub> =  $17.4 \pm 0.9$  ms,  
478 n = 7, p = 0.001; paired Student's t-test). In contrast, TBOA increased decay constants of  
479 KO EPSCs by 73% (KO  $\tau_{\text{decay}}$  control vs. TBOA; KO<sub>Control</sub> =  $11.1 \pm 1.1$  ms vs. KO<sub>TBOA</sub> =  
480  $19.1 \pm 2.2$  ms, n = 7, p = 0.001; paired Student's t-test). After TBOA exposure, WT and  
481 KO had similar decay constants ( $\tau_{\text{decay}}$  WT vs. KO in TBOA; p = 0.48; unpaired  
482 Student's t-test). However, the relative effect of TBOA on decay was greater in KO

483 EPSCs (**Figure 6D**; % increase in  $\tau_{\text{decay}}$  WT vs. KO,  $p = 0.003$ ; unpaired Student's t-test)  
484 consistent with enhanced glutamate clearance by surrounding glutamate transporters.

485

486 **Repetitive stimulation of CFs suggests lower release probability in the  $\alpha 2\delta$ -2**

487 **knockout, though cumulative vesicle release is greater**

488 The enhanced multivesicular release in the  $\alpha 2\delta$ -2 KO (**Figure 6A-B**) suggests a  
489 presynaptic contribution to the CF EPSC phenotype. CF synapses have high initial  
490 probability of release ( $P_R$ ), which is associated with paired-pulse depression at short  
491 interstimulus intervals (Hashimoto and Kano, 1998). However, CF-evoked EPSCs from  
492 KO mice showed a consistent increase in the paired-pulse ratio when compared with WT  
493 CFs (**Figures 7A and 7B**; Paired-pulse ratio: WT =  $0.41 \pm 0.03$ ,  $n = 17$ ; KO =  $0.51 \pm$   
494  $0.02$ ,  $n = 18$ ,  $p = 0.01$ ; unpaired Student's t-test), suggesting CFs have a lower  $P_R$  when  
495  $\alpha 2\delta$ -2 is deleted. Therefore, we hypothesized that KO CFs might have a substantially  
496 greater readily releasable pool of vesicles to exhibit increased multivesicular release  
497 while also having a lower  $P_R$ .

498 To estimate the relative size of the readily releasable pool in WT and KO, we  
499 stimulated CFs with a 10 Hz train. WT and KO CF synapses had strikingly different  
500 responses during repetitive stimulation. Both genotypes exhibited a delayed facilitation  
501 followed by depression, which may indicate multiple pools of vesicles with differing  
502 release probabilities (Lu and Trussell, 2016). However, KO EPSCs were larger at every  
503 stimulus throughout the train (**Figures 7C-E**), providing further evidence of enhanced  
504 vesicle release compared to WT. A linear fit to the last 10 responses of a cumulative  
505 amplitude plot produced a steeper slope (Linear regression using 95% Confidence

506 Intervals;  $WT_{\text{slope}} = 78.7 \pm 0.6$ ,  $n = 5$ ;  $KO_{\text{slope}} = 172.2 \pm 0.5$ ,  $n = 5$ ;  $p < 0.0001$ ; unpaired  
507 Student's t-test) and a larger y-intercept in KO PCs when compared to WT (**Figure 7F**).  
508 This analysis provided an estimate of the readily releasable pool (Schneppenburger et al.,  
509 1999), which was 29% larger in the KO compared to WT (WT y-intercept =  $2.08 \pm 0.02$   
510 nA,  $n = 5$ ; KO y-intercept =  $2.77 \pm 0.01$  nA,  $n = 5$ ;  $p < 0.0001$ ; unpaired Student's t-test).  
511 Thus, both a single stimulus (**Figure 6A-B**) and repetitive stimulation of CFs produced  
512 increased vesicle release in the  $\alpha 2\delta$ -2 KO, suggesting either an enhancement of a low  $P_R$   
513 pool of vesicles (Lu and Trussell, 2016) and/or more discrete release sites with reduced  
514  $P_R$  compared to WT.

515

#### 516 **CF terminals in $\alpha 2\delta$ -2 knockout have more release sites**

517 Because we did not see an increased density of VGLUT2<sup>+</sup> puncta by light  
518 microscopy, we hypothesized CF terminals in the KO had either a greater number of  
519 release sites or vesicles. CF terminals can be identified with electron microscopy (EM) by  
520 their high density of round synaptic vesicles (SVs) and contacts onto PC “thorns” along  
521 primary PC dendritic shafts (Palay and Chan-Palay, 1974; Miyazaki et al., 2004). While  
522 blinded to genotype, we imaged and quantified CF terminals from WT and KO mice (10-  
523 15 images/animal; see Materials and Methods). In agreement with VGLUT2<sup>+</sup> puncta size  
524 determined by confocal microscopy (**Figure 4D**), CF terminal cross-sectional area was  
525 no different between genotypes when sampled using EM (**Figures 8A and 8B**). WT and  
526 KO CF terminals also had an equivalent density of synaptic vesicles (SVs) (**Figure 8C**)  
527 and no change in number of SVs within 100 nm of the synaptic contact, a proxy for the



528 readily releasable pool (WT =  $18.5 \pm 2.4$  SV/ $\mu\text{m}_{\text{Contact}}$ , n = 5 mice; KO =  $20.4 \pm 2.7$   
529 SV/ $\mu\text{m}_{\text{Contact}}$ , n = 6 mice, p = 0.6; unpaired Student's t-test).

530 However, the number of synaptic contacts made by CF terminals in  $\alpha 2\delta$ -2 KOs  
531 was nearly twice that of WT (**Figure 8A and 8D**; WT =  $1.08 \pm 0.16$  contacts/terminal, n  
532 = 5 mice; KO =  $2.08 \pm 0.17$  contacts/terminal, n = 6 mice, p = 0.009; Mann-Whitney  
533 test). Moreover, the distribution of the number of contacts made by CF terminals was  
534 right-shifted in KO (**Figure 8E**; p < 0.002; Kolmogorov-Smirnov test). Although  
535 quantifying synaptic contacts per terminal using single EM sections likely underestimates  
536 the true number of contacts per terminal, the observed doubling of discrete contacts made  
537 by KO CFs is consistent with increased multivesicular release in the  $\alpha 2\delta$ -2 KO.

538

### 539 **Differential *Cacna2d* isoform expression in the inferior olive and Purkinje cell layer**

540 By *in situ* hybridization, there is robust and exclusive expression of the *Cacna2d2*  
541 isoform in PCs, and relatively low expression in the inferior olive (IO), which gives rise  
542 to climbing fibers (Cole et al., 2005; Lein et al., 2007). Given the presynaptic  
543 morphological and physiological changes we observed at *Cacna2d2* KO CF-PC  
544 synapses, we re-examined expression of  $\alpha 2\delta$  isoforms in the Purkinje cell layer (PCL)  
545 and IO using quantitative PCR of fresh-frozen tissue obtained by laser capture  
546 microdissection (**Figure 9A**). In agreement with prior observations (Cole et al., 2005;  
547 Lein et al., 2007), PCL tissue from wildtype mice expressed the  $\alpha 2\delta$ -2 isoform  $3.85 \pm$   
548  $0.96$ -fold higher than presynaptic IO samples (**Figure 9B**; *Cacna2d2*  $\Delta\text{Ct}_{\text{PCL}} = 1.62 \pm$   
549  $0.17$ ;  $\Delta\text{Ct}_{\text{IO}} = 3.37 \pm 0.38$ , n = 4, p = 0.03; paired Student's t-test). PCL tissue also  
550 contained low expression of  $\alpha 2\delta$ -1 and high levels of  $\alpha 2\delta$ -3 transcript due the inclusion of

551 other cell types in the sample, such as Bergmann glia and molecular layer interneurons,  
552 which can be appreciated by expression patterns apparent from *in situ* hybridization (Cole  
553 et al., 2005; Lein et al., 2007). Consistent with previous reports,  $\alpha 2\delta$ -4 was undetectable  
554 in both PCL and IO samples. Importantly, analysis of *Cacna2d* transcripts from IO  
555 samples revealed that  $\alpha 2\delta$ -1 is the predominant isoform (**Figure 9C**), and is  $7.0 \pm 2.4$ -  
556 fold more abundant than  $\alpha 2\delta$ -2 in IO samples (*Cacna2d1*  $\Delta Ct_{IO} = 0.94 \pm 0.4$ ; *Cacna2d2*  
557  $\Delta Ct_{IO} = 3.37 \pm 0.38$ ,  $n = 4$ ,  $p = 0.04$ ; paired Student's t-test). These results suggest that  
558 the locus of action of  $\alpha 2\delta$ -2 at CF-PC synapses is predominately postsynaptic.

559

## 560 **Discussion**

561 In mice lacking  $\alpha 2\delta$ -2, profound deficiencies in CF-induced complex spike (CpS)  
562 generation were associated with altered underlying CF-evoked EPSC amplitude and  
563 kinetics. CpSs are initiated by a AMPAR-mediated depolarization that drives an initial  
564 sodium spike followed by multiple axonally generated 'spikelets' (Davie et al., 2008).  
565 Furthermore, dynamic clamp experiments suggested that increased CF EPSC amplitudes  
566 would result in depolarization block of spikelet generation (Davie et al., 2008). Thus, we  
567 hypothesize that increased glutamatergic transmission and accelerated EPSC kinetics  
568 (Rudolph et al., 2011) shape the CpS in the  $\alpha 2\delta$ -2 KO (**Figure 10**).

569 Each CF terminal in the KO contained more discrete synaptic contacts, leading to  
570 increased multivesicular release and consequently larger EPSCs, despite an apparent  
571 reduction in the probability of release. Together, these findings seem to contradict  
572 observations in which synapse formation is positively regulated by  $\alpha 2\delta$  expression (Li et

573 al., 2004; Eroglu et al., 2009; Chen et al., 2018; Risher et al., 2018), reflecting a more  
574 complex and nuanced role of  $\alpha 2\delta$  proteins in the  $\alpha 2\delta$ -2 KO phenotype.

575

### 576 **$\alpha 2\delta$ -2 proteins as auxiliary $\text{Ca}^{2+}$ channel subunits**

577  $\alpha 2\delta$  proteins were first identified as auxiliary subunits of voltage-dependent  $\text{Ca}^{2+}$   
578 channels (VDCCs) that facilitate surface trafficking of VDCCs in heterologous  
579 expression systems (Canti et al., 2005; Cassidy et al., 2014).  $\alpha 2\delta$ -1 knockdown reduces  
580 presynaptic vesicle release in cultured hippocampal neurons (Hoppa et al., 2012), and  
581 capacitive measurements from inner hair cells of the spontaneous *Cacna2d2* mutant,  
582 *du/du*, show reduced exocytosis (Fell et al., 2016). We also observed a lowered release  
583 probability ( $P_R$ ) at the CF-PC synapse, as determined by paired-pulse ratio, which is  
584 consistent with these prior observations and could relate to altered VDCC localization or  
585 abundance in CFs. Given that  $\alpha 2\delta$ -1 is the predominant isoform expressed by inferior  
586 olivary cells (Cole et al., 2005; Lein et al., 2007), if the phenotype we observed is  
587 mediated by presynaptic loss of  $\alpha 2\delta$ -2, it suggests isoform-specific functions that cannot  
588 be compensated by  $\alpha 2\delta$ -1. Furthermore, this raises the possibility that different  $\alpha 2\delta$   
589 isoforms in individual neurons may have distinct functional roles.

590 In addition to their abundant  $\alpha 2\delta$ -2 expression, PCs highly express the VDCC,  
591 Cav2.1 (Barclay et al., 2001a), which localizes to PC somata and primary dendrites in  
592 scattered and clustered patterns (Indriati et al., 2013). Dissociated PCs from the  
593 spontaneous mutant, *du<sup>2j</sup>/du<sup>2j</sup>*, have ~30% reduced somatic calcium currents (Barclay et  
594 al., 2001a). Similarly, CF vesicle release is mostly (70-90%) regulated by Cav2.1  
595 (Regehr and Mintz, 1994). Because CF-PC transmission and development has been

596 extensively characterized in Cav2.1 mutant mice (Matsushita et al., 2002; Miyazaki et al.,  
597 2004; Hashimoto et al., 2011), we looked to this literature for clues as to whether our  
598 observed phenotypes could reflect altered pre- and/or postsynaptic VDCC function or  
599 localization.

600 For example, the *leaner* phenotype, in which a Cav2.1 pore mutation reduces PC  
601 calcium currents by 60%, is associated with larger, rapidly decaying CF-evoked EPSCs  
602 (Liu and Friel, 2008), like the  $\alpha 2\delta$ -2 KO. However, *leaner* CFs do not exhibit changes in  
603  $P_R$  (Liu and Friel, 2008). Other Cav2.1 pore mutants show reductions in PC calcium  
604 current analogous to  $\alpha 2\delta$ -2 mutants, but display heterogeneity in EPSC phenotypes. Both  
605 *rolling Nagoya* and *tottering* mutants have 40% reductions in calcium currents, yet  
606 *rolling Nagoya* exhibits larger, slowly decaying EPSCs, whereas *tottering* EPSCs are  
607 unchanged (Matsushita et al., 2002). PC-specific Cav2.1 KO show proximal innervation  
608 by CFs (Miyazaki et al., 2012), reminiscent of the CF redistribution we observed in  
609 *Cacna2d2* KOs. This striking similarity provides evidence for postsynaptic control of CF  
610 development. Surprisingly however, global and PC-specific Cav2.1 KOs exhibit normal  
611 CF EPSC amplitude and decay kinetics (Miyazaki et al., 2004; Hashimoto et al., 2011).  
612 Thus, although some similarities exist between the *Cacna2d2* KO and certain VDCC  
613 mutant mice, the roles of  $\alpha 2\delta$ -2 at the CF-PC synapse likely involve other effector  
614 mechanisms.  $\alpha 2\delta$ -2 loss may be more nuanced than altered VDCC abundance, but  
615 perhaps result from differences in VDCC localization, clustering or association with other  
616 molecules (including other VDCC subtypes).

617 Altered presynaptic function could result from PC-driven morphological changes  
618 in the *Cacna2d2* KO, independent of altered presynaptic VDCC trafficking. For example,

619 alterations in presynaptic morphology alone, rather than altered presynaptic gene  
620 expression, can influence measures of apparent  $P_R$  and the readily releasable pool size by  
621 repetitive stimulation (Fekete et al., 2019). It is also possible that  $P_R$  at individual release  
622 sites is unchanged, but an increased number of release sites per terminal could allow for  
623 accumulation of  $[Ca^{2+}]_i$  during repetitive stimulation via inter-site crosstalk. In this  
624 scenario, repetitive stimuli recruit vesicles from a low  $P_R$  pool, sustaining release during  
625 subsequent stimuli. Currently, there is no definitive way to distinguish between a  
626 heterogeneous population of  $P_R$  at discrete release sites, or whether the vesicle  
627 recruitment from low vs. high  $P_R$  pools differs (Kaeser and Regehr, 2017). The possibility  
628 of multiple vesicle pools in the CF, as seen by the bimodal responses in **Figure 7C**,  
629 complicates our ability to derive readily releasable pool size and  $P_R$  at this synapse  
630 (Neher, 2015; Lu and Trussell, 2016). Given the various possible effector mechanisms  
631 for  $\alpha 2\delta$ -2 that could contribute to the phenotype in mutant mice, further experiments  
632 using cell-type selective genetic manipulations will be necessary to fully understand the  
633 locus of  $\alpha 2\delta$ -2 action.

634

### 635 **$\alpha 2\delta$ -2 proteins as synaptic organizers**

636 Recently, roles for  $\alpha 2\delta$  proteins independent of VDCCs are supported by their  
637 ability to regulate synapse formation despite pharmacological block or deletion of  
638 VDCCs (Eroglu et al., 2009; Kurshan et al., 2009).  $\alpha 2\delta$ -1 induces excitatory synapse  
639 formation in response to glial-secreted thrombospondin (Eroglu et al., 2009), which is  
640 dependent on postsynaptic signaling through N-methyl-D-aspartate receptors (NMDARs)  
641 (Risher et al., 2018). Though NMDARs are transiently expressed in newborn rat PCs

642 (Rosenmund et al., 1992), they are not detected at mouse CF-PC synapses until late  
643 adulthood (Piochon et al., 2007; Renzi et al., 2007), making this interaction unlikely to  
644 contribute to the *Cacna2d2* KO phenotype.

645         Studies in *C. elegans* suggest trans-synaptic roles for  $\alpha 2\delta$  proteins, as presynaptic  
646  $\alpha 2\delta$ -3 and binds to postsynaptic neurexin to control neuromuscular synaptic function  
647 (Tong et al., 2017). In mammals, neurexins are presynaptically expressed (Missler et al.,  
648 2003; Zhang et al., 2015) and interact trans-synaptically with postsynaptic neuroligins.  
649 Interestingly, similar to our observations in the *Cacna2d2* KO, the neuroligin triple KO  
650 mouse (Zhang et al., 2015) also has a proximally-shifted CF distribution, without a  
651 change in VGLUT2<sup>+</sup> puncta size or overall density (Zhang et al., 2015). Although CF-PC  
652 synaptic function is unchanged in the neuroligin tKO (Zhang et al., 2015), this finding  
653 suggests that  $\alpha 2\delta$ -2 may act in parallel with neurexin-neuroligin to coordinate features  
654 such as synaptic localization, whereas the functional components that depend on  $\alpha 2\delta$ -2  
655 involve other effector mechanisms.

656         The stereotyped development of the CF-PC synapse has made it an attractive  
657 model to study numerous important molecules that share mutant phenotypes, yet have  
658 quite disparate functions. For example, the CF innervation pattern is modulated by  
659 postsynaptically expressed neuroligins, TrkB, Cav2.1, GluR $\delta$ 2 (exclusively expressed in  
660 PCs), cerebellins and myosin Va (reviewed in Bosman and Konnerth, 2009), revealing  
661 CF redistribution as a sensitive indicator of underlying dysfunction, and demonstrating  
662 postsynaptic control of synaptic innervation. Although *Cacna2d2* KO mice share this  
663 phenotype, additional functional alterations at the CF-PC synapse are dissimilar from

664 other mutant mice. Thus, our data suggest that the contributions of  $\alpha 2\delta$ -2 to the CF-PC  
665 synapse may comprise both VDCC-dependent and -independent mechanisms.

666

### 667 **Impacts of $\alpha 2\delta$ -2 loss on cerebellar function**

668 Of the four  $\alpha 2\delta$  isoforms (*Cacna2d1-4*),  $\alpha 2\delta$ -2 loss has the most severe  
669 phenotype, as mice and humans with *Cacna2d2* mutations have ataxia, epilepsy and  
670 motor control deficits (Barclay et al., 2001b; Brodbeck et al., 2002; Ivanov et al., 2004;  
671 Donato et al., 2006; Pippucci et al., 2013). Because PCs provide the output from the  
672 cerebellum, some of these neurologic phenotypes likely reflect PC dysfunction. PC spike-  
673 rate and plasticity are instructed by CpSs, providing error prediction information for  
674 motor coordination, presumably graded by the number of spikelets generated (Rasmussen  
675 et al., 2013; Yang and Lisberger, 2014; Burroughs et al., 2017). As CpSs generated by  
676 *Cacna2d2* KO PCs had fewer spikelets, we predict PC information transfer is degraded,  
677 implicating direct influence of  $\alpha 2\delta$ -2 loss in cerebellar dysfunction.

678 Particularly surprising was the variety of alterations at the *Cacna2d2* KO CF-PC  
679 synapse, including enhanced glutamate re-uptake. It is likely that some phenotypes  
680 developed as compensation for a primary derangement directly related to  $\alpha 2\delta$ -2 loss.  
681 Delayed conditional deletion of  $\alpha 2\delta$  may help to clarify this issue. Likewise, deletion of  
682  $\alpha 2\delta$ -2 may have differential effects on other synapses and functions, either onto PCs or  
683 other cell types. As many neurons co-express multiple  $\alpha 2\delta$  isoforms, it will be important  
684 to understand the role of each isoform at individual synapses, as well as address whether  
685 postsynaptic  $\alpha 2\delta$  proteins instruct presynaptic development or function (or vice versa),

686 using cell-specific targeted rescue or deletion. Overall, our results underscore the critical  
687 roles of  $\alpha 2\delta$ -2 in both proper organization and transmission at the CF-PC synapse.

688

689 **References**

690

691 Auger C, Attwell D (2000) Fast removal of synaptic glutamate by postsynaptic  
692 transporters. *Neuron* 28:547-558.

693 Barclay J, Balaguero N, Mione M, Ackerman SL, Letts VA, Brodbeck J, Canti C, Meir  
694 A, Page KM, Kusumi K, Perez-Reyes E, Lander ES, Frankel WN, Gardiner MR,  
695 Dolphin AC, Rees M (2001a) Ducky Mouse Phenotype of Epilepsy and Ataxia Is  
696 Associated with Mutations in the *Cacna2d2* Gene and Decreased Calcium  
697 Channel Current in Cerebellar Purkinje Cells. *The Journal of Neuroscience*  
698 21:6095-6104.

699 Barclay J, Balaguero N, Mione M, Ackerman SL, Letts VA, Brodbeck J, Canti C, Meir  
700 A, Page KM, Kusumi K, Perez-Reyes E, Lander ES, Frankel WN, Gardiner RM,  
701 Dolphin AC, Rees M (2001b) Ducky Mouse Phenotype of Epilepsy and Ataxia Is  
702 Associated with Mutations in the *Cacna2d2* Gene and Decreased Calcium  
703 Channel Current in Cerebellar Purkinje Cells. *The Journal of Neuroscience*  
704 21:6095-6104.

705 Bergles DE, Dzubay JA, Jahr CE (1997) Glutamate transporter currents in bergmann glial  
706 cells follow the time course of extrasynaptic glutamate. *Proc Natl Acad Sci U S A*  
707 94:14821-14825.



- 708 Boning Gao YS, Anton Maximov, Mohamad Saad, Eva Forgacs<sup>‡</sup>, Farida Latif, Ming H.  
709 Wei (2000) Functional Properties of a New Voltage-dependent Calcium Channel  
710 The Journal of Biological Chemistry 275:12237-12242.
- 711 Bosman LW, Konnerth A (2009) Activity-dependent plasticity of developing climbing  
712 fiber-Purkinje cell synapses. Neuroscience 162:612-623.
- 713 Brockhaus J, Schreitmuller M, Repetto D, Klatt O, Reissner C, Elmslie K, Heine M,  
714 Missler M (2018) alpha-Neurexins Together with alpha2delta-1 Auxiliary  
715 Subunits Regulate Ca(2+) Influx through Cav2.1 Channels. J Neurosci 38:8277-  
716 8294.
- 717 Brodbeck J, Davies A, Courtney JM, Meir A, Balaguero N, Canti C, Moss FJ, Page KM,  
718 Pratt WS, Hunt SP, Barclay J, Rees M, Dolphin AC (2002) The ducky mutation in  
719 Cacna2d2 results in altered Purkinje cell morphology and is associated with the  
720 expression of a truncated alpha 2 delta-2 protein with abnormal function. J Biol  
721 Chem 277:7684-7693.
- 722 Brown JP, Gee NS (1998) Cloning and Deletion Mutagenesis of the alpha2delta Calcium  
723 Channel Subunit from Porcine Cerebral Cortex. The Journal of Biological  
724 Chemistry 273:25458-25465.
- 725 Burroughs A, Wise AK, Xiao J, Houghton C, Tang T, Suh CY, Lang EJ, Apps R,  
726 Cerminara NL (2017) The dynamic relationship between cerebellar Purkinje cell  
727 simple spikes and the spikelet number of complex spikes. J Physiol 595:283-299.
- 728 Canti C, Nieto-Rostro M, Foucault I, Heblich F, Wratten J, Richards MW, Hendrich J,  
729 Douglas L, Page KM, Davies A, Dolphin AC (2005) The metal-ion-dependent  
730 adhesion site in the Von Willebrand factor-A domain of alpha2delta subunits is

731 key to trafficking voltage-gated Ca<sup>2+</sup> channels. Proc Natl Acad Sci U S A  
732 102:11230-11235.

733 Cassidy JS, Ferron L, Kadurin I, Pratt WS, Dolphin AC (2014) Functional exofacially  
734 tagged N-type calcium channels elucidate the interaction with auxiliary  
735 alpha2delta-1 subunits. Proc Natl Acad Sci U S A 111:8979-8984.

736 Chen J, Li L, Chen SR, Chen H, Xie JD, Sirrieh RE, MacLean DM, Zhang Y, Zhou MH,  
737 Jayaraman V, Pan HL (2018) The alpha2delta-1-NMDA Receptor Complex Is  
738 Critically Involved in Neuropathic Pain Development and Gabapentin  
739 Therapeutic Actions. Cell Rep 22:2307-2321.

740 Cole RL, Lechner SM, Williams ME, Prodanovich P, Bleicher L, Varney MA, Gu G  
741 (2005) Differential distribution of voltage-gated calcium channel alpha-2 delta  
742 (alpha2delta) subunit mRNA-containing cells in the rat central nervous system  
743 and the dorsal root ganglia. J Comp Neurol 491:246-269.

744 Davie JT, Clark BA, Hausser M (2008) The origin of the complex spike in cerebellar  
745 Purkinje cells. J Neurosci 28:7599-7609.

746 Dittman JS, Regehr WG (1998) Calcium Dependence and Recovery Kinetics of  
747 Presynaptic Depression at the Climbing Fiber to Purkinje Cell Synapse. The  
748 Journal of Neuroscience 18:6147-6162.

749 Dolphin AC (2012) Calcium channel auxiliary alpha2delta and beta subunits: trafficking  
750 and one step beyond. Nat Rev Neurosci 13:542-555.

751 Donato R, Page KM, Koch D, Nieto-Rostro M, Foucault I, Davies A, Wilkinson T, Rees  
752 M, Edwards FA, Dolphin AC (2006) The ducky(2J) mutation in Cacna2d2 results

753 in reduced spontaneous Purkinje cell activity and altered gene expression. J  
754 Neurosci 26:12576-12586.

755 Edvardson S, Oz S, Abulhijaa FA, Taher FB, Shaag A, Zenvirt S, Dascal N, Elpeleg O  
756 (2013) Early infantile epileptic encephalopathy associated with a high voltage  
757 gated calcium channelopathy. J Med Genet 50:118-123.

758 Eroglu C, Allen NJ, Susman MW, O'Rourke NA, Park CY, Ozkan E, Chakraborty C,  
759 Mulinyawe SB, Annis DS, Huberman AD, Green EM, Lawler J, Dolmetsch R,  
760 Garcia KC, Smith SJ, Luo ZD, Rosenthal A, Mosher DF, Barres BA (2009)  
761 Gabapentin receptor alpha2delta-1 is a neuronal thrombospondin receptor  
762 responsible for excitatory CNS synaptogenesis. Cell 139:380-392.

763 Fekete A, Nakamura Y, Yang YM, Herlitz S, Mark MD, DiGregorio DA, Wang LY  
764 (2019) Underpinning heterogeneity in synaptic transmission by presynaptic  
765 ensembles of distinct morphological modules. Nat Commun 10:826.

766 Fell B, Eckrich S, Blum K, Eckrich T, Hecker D, Obermair GJ, Munkner S, Flockerzi V,  
767 Schick B, Engel J (2016) alpha2delta2 Controls the Function and Trans-Synaptic  
768 Coupling of Cav1.3 Channels in Mouse Inner Hair Cells and Is Essential for  
769 Normal Hearing. J Neurosci 36:11024-11036.

770 Gee NS, Brown JP, Dissanayake VUK, Offord J, Thurlow R, Woodruff GN (1996) The  
771 Novel Anticonvulsant Drug, Gabapentin (Neurontin), Binds to the The Journal of  
772 Biological Chemistry 271:5768-5776.

773 Geisler S, Schopf CL, Stanika R, Kalb M, Campiglio M, Repetto D, Traxler L, Missler  
774 M, Obermair GJ (2019) Presynaptic alpha2delta-2 Calcium Channel Subunits

- 775 Regulate Postsynaptic GABAA Receptor Abundance and Axonal Wiring. J  
776 Neurosci 39:2581-2605.
- 777 Harrison J, Jahr CE (2003) Receptor Occupancy Limits Synaptic Depression at Climbing  
778 Fiber Synapses. The Journal of Neuroscience 23:377-383.
- 779 Hashimoto K, Kano M (1998) Presynaptic origin of paired-pulse depression at climbing  
780 fibre-Purkinje cell synapses in the rat cerebellum. J Physiol 506 ( Pt 2):391-405.
- 781 Hashimoto K, Ichikawa R, Kitamura K, Watanabe M, Kano M (2009) Translocation of a  
782 "winner" climbing fiber to the Purkinje cell dendrite and subsequent elimination  
783 of "losers" from the soma in developing cerebellum. Neuron 63:106-118.
- 784 Hashimoto K, Tsujita M, Miyazaki T, Kitamura K, Yamazaki M, Shin HS, Watanabe M,  
785 Sakimura K, Kano M (2011) Postsynaptic P/Q-type Ca<sup>2+</sup> channel in Purkinje cell  
786 mediates synaptic competition and elimination in developing cerebellum. Proc  
787 Natl Acad Sci U S A 108:9987-9992.
- 788 Heffley W, Song EY, Xu Z, Taylor BN, Hughes MA, McKinney A, Joshua M, Hull C  
789 (2018) Coordinated cerebellar climbing fiber activity signals learned sensorimotor  
790 predictions. Nat Neurosci 21:1431-1441.
- 791 Hoppa MB, Lana B, Margas W, Dolphin AC, Ryan TA (2012) alpha2delta expression  
792 sets presynaptic calcium channel abundance and release probability. Nature  
793 486:122-125.
- 794 Indriati DW, Kamasawa N, Matsui K, Meredith AL, Watanabe M, Shigemoto R (2013)  
795 Quantitative localization of Cav2.1 (P/Q-type) voltage-dependent calcium  
796 channels in Purkinje cells: somatodendritic gradient and distinct somatic

797           coclustering with calcium-activated potassium channels. *J Neurosci* 33:3668-  
798           3678.

799   Ivanov SV, Ward JM, Tessarollo L, McAreavey D, Sachdev V (2004) Cerebellar Ataxia,  
800           Seizures, Premature Death, and Cardiac Abnormalities in Mice with Targeted  
801           Disruption of the *Cacna2d2* Gene. *American Journal of Pathology* 165:1007-  
802           1018.

803   Kaeser PS, Regehr WG (2017) The readily releasable pool of synaptic vesicles. *Curr*  
804           *Opin Neurobiol* 43:63-70.

805   Khaliq ZM, Raman IM (2005) Axonal propagation of simple and complex spikes in  
806           cerebellar Purkinje neurons. *J Neurosci* 25:454-463.

807   Kurshan PT, Oztan A, Schwarz TL (2009) Presynaptic  $\alpha$ 2delta-3 is required for  
808           synaptic morphogenesis independent of its  $Ca^{2+}$ -channel functions. *Nat Neurosci*  
809           12:1415-1423.

810   Lein ES et al. (2007) Genome-wide atlas of gene expression in the adult mouse brain.  
811           *Nature* 445:168-176.

812   Li CY, Song YH, Higuera ES, Luo ZD (2004) Spinal dorsal horn calcium channel  
813            $\alpha$ 2delta-1 subunit upregulation contributes to peripheral nerve injury-induced  
814           tactile allodynia. *J Neurosci* 24:8494-8499.

815   Liu S, Friel DD (2008) Impact of the leaner P/Q-type  $Ca^{2+}$  channel mutation on  
816           excitatory synaptic transmission in cerebellar Purkinje cells. *J Physiol* 586:4501-  
817           4515.

818   Lu HW, Trussell LO (2016) Spontaneous Activity Defines Effective Convergence Ratios  
819           in an Inhibitory Circuit. *J Neurosci* 36:3268-3280.

- 820 Matsushita K, Wakamori M, Rhyu IJ, Arii T, Oda S-i, Mori Y, Imoto K (2002)  
821 Bidirectional Alterations in Cerebellar Synaptic Transmission of tottering and  
822 rolling Ca<sub>2</sub>. *The Journal of Neuroscience* 22:4388-4398.
- 823 Missler M, Zhang W, Rohlmann A, Kattenstroth G, Hammer RE, Gottmann K, Sudhof  
824 TC (2003) a-Neurexins couple Ca<sub>2</sub> channels to synaptic vesicle exocytosis.  
825 *Nature* 423:939-948.
- 826 Miyazaki T, Hashimoto K, Shin HS, Kano M, Watanabe M (2004) P/Q-type Ca<sup>2+</sup>  
827 channel alpha1A regulates synaptic competition on developing cerebellar Purkinje  
828 cells. *J Neurosci* 24:1734-1743.
- 829 Miyazaki T, Yamasaki M, Hashimoto K, Yamazaki M, Abe M, Usui H, Kano M,  
830 Sakimura K, Watanabe M (2012) Cav2.1 in cerebellar Purkinje cells regulates  
831 competitive excitatory synaptic wiring, cell survival, and cerebellar biochemical  
832 compartmentalization. *J Neurosci* 32:1311-1328.
- 833 Neher E (2015) Merits and Limitations of Vesicle Pool Models in View of  
834 Heterogeneous Populations of Synaptic Vesicles. *Neuron* 87:1131-1142.
- 835 Palay SL, Chan-Palay V (1974) *Cerebellar Cortex: Cytology and Organization*. Berlin,  
836 Heidelberg, New York: Springer.
- 837 Paukert M, Huang YH, Tanaka K, Rothstein JD, Bergles DE (2010) Zones of enhanced  
838 glutamate release from climbing fibers in the mammalian cerebellum. *J Neurosci*  
839 30:7290-7299.
- 840 Piochon C, Irinopoulou T, Bruscianno D, Bailly Y, Mariani J, Levenes C (2007) NMDA  
841 receptor contribution to the climbing fiber response in the adult mouse Purkinje  
842 cell. *J Neurosci* 27:10797-10809.

- 843 Pippucci T, Parmeggiani A, Palombo F, Maresca A, Angius A, Crisponi L, Cucca F,  
844 Liguori R, Valentino ML, Seri M, Carelli V (2013) A novel null homozygous  
845 mutation confirms CACNA2D2 as a gene mutated in epileptic encephalopathy.  
846 PLoS One 8:e82154.
- 847 Prescott C, Weeks AM, Staley KJ, Partin KM (2006) Kynurenic acid has a dual action on  
848 AMPA receptor responses. *Neurosci Lett* 402:108-112.
- 849 Rasmussen A, Jirenhed DA, Zucca R, Johansson F, Svensson P, Hesslow G (2013)  
850 Number of spikes in climbing fibers determines the direction of cerebellar  
851 learning. *J Neurosci* 33:13436-13440.
- 852 Regehr WG, Mintz IM (1994) Participation of Multiple Calcium Channel Types in  
853 Transmission at Single Climbing Fiber to Purkinje Cell Synapses. *Neuron* 12:605-  
854 613.
- 855 Renzi M, Farrant M, Cull-Candy SG (2007) Climbing-fibre activation of NMDA  
856 receptors in Purkinje cells of adult mice. *J Physiol* 585:91-101.
- 857 Risher WC, Kim N, Koh S, Choi JE, Mitev P, Spence EF, Pilaz LJ, Wang D, Feng G,  
858 Silver DL, Soderling SH, Yin HH, Eroglu C (2018) Thrombospondin receptor  
859 alpha2delta-1 promotes synaptogenesis and spinogenesis via postsynaptic Rac1. *J*  
860 *Cell Biol* 217:3747-3765.
- 861 Rosenmund C, Legendre P, Westbrook G (1992) Expression of NMDA Channels on  
862 Cerebellar Purkinje Cells Acutely Dissociated from Newborn Rats. *Journal of*  
863 *Neurophysiology* 68.

- 864 Roth A, Häusser M (2001) Compartmental models of rat cerebellar Purkinje cells based  
865 on simultaneous somatic and dendritic patch-clamp recordings. *Journal of*  
866 *Physiology* 535:445-472.
- 867 Rudolph S, Overstreet-Wadiche L, Wadiche JI (2011) Desynchronization of  
868 multivesicular release enhances Purkinje cell output. *Neuron* 70:991-1004.
- 869 Schneggenburger R, Meyer AC, Neher E (1999) Released Fraction and Total Size of a  
870 Pool of Immediately Available Transmitter Quanta at a Calyx Synapse. *Neuron*  
871 23:399-409.
- 872 Tong XJ, Lopez-Soto EJ, Li L, Liu H, Nedelcu D, Lipscombe D, Hu Z, Kaplan JM  
873 (2017) Retrograde Synaptic Inhibition Is Mediated by alpha-Neurexin Binding to  
874 the alpha2delta Subunits of N-Type Calcium Channels. *Neuron* 95:326-340 e325.
- 875 Wadiche JI, Jahr CE (2001) Multivesicular release at climbing fiber-Purkinje cell  
876 synapses. *Neuron* 32:301-313.
- 877 Wang T, Jones RT, Whippen JM, Davis GW (2016) alpha2delta-3 Is Required for Rapid  
878 Transsynaptic Homeostatic Signaling. *Cell Rep* 16:2875-2888.
- 879 Yang Y, Lisberger SG (2014) Purkinje-cell plasticity and cerebellar motor learning are  
880 graded by complex-spike duration. *Nature* 510:529-532.
- 881 Zhang B, Chen LY, Liu X, Maxeiner S, Lee SJ, Gokce O, Sudhof TC (2015) Neuroligins  
882 Sculpt Cerebellar Purkinje-Cell Circuits by Differential Control of Distinct  
883 Classes of Synapses. *Neuron* 87:781-796.
- 884
- 885



## 886 **Figures**

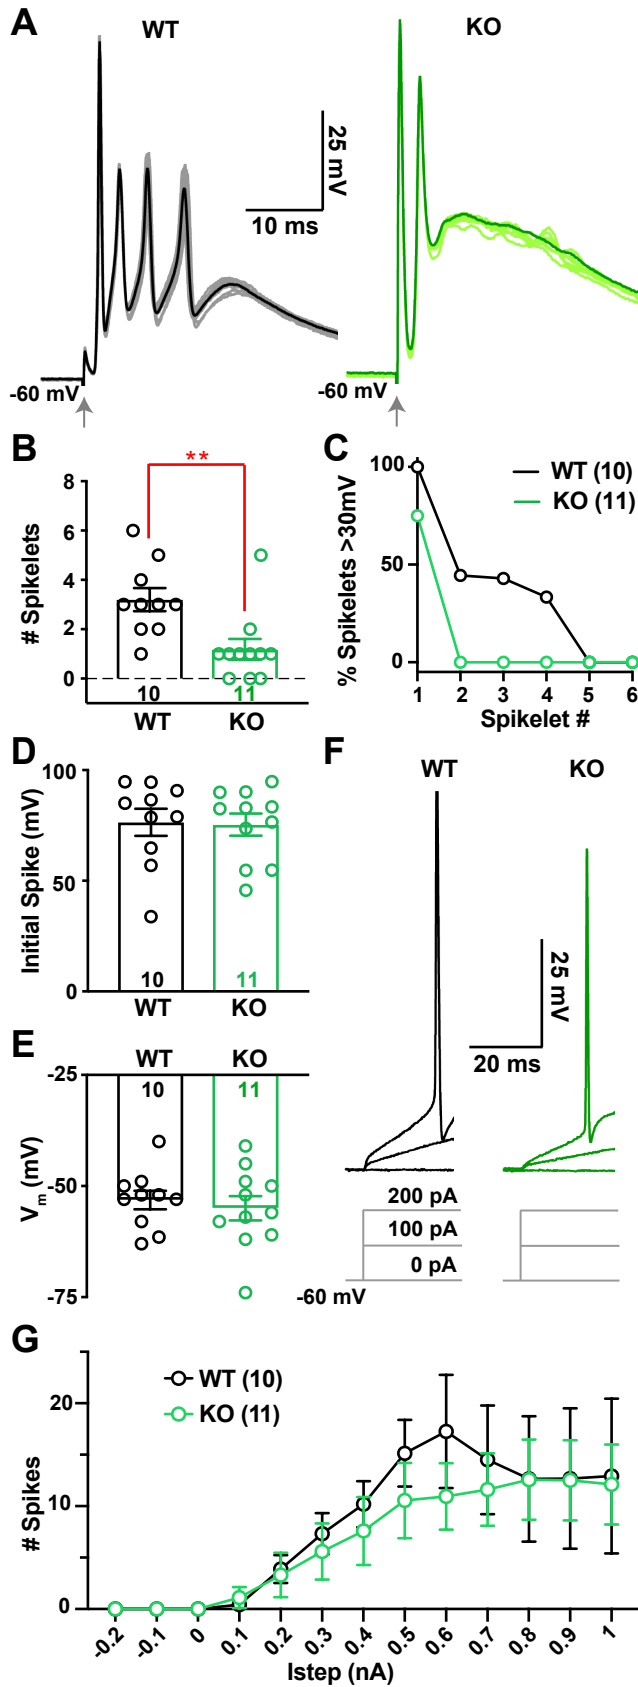

887

888 **Figure 1 Climbing fiber (CF)-evoked complex spikes (CpSs) are altered in the**  
889 ***Cacna2d2* KO, but intrinsic PC excitability is unchanged.**  
890  
891 (A) Representative CF-evoked complex spikes in WT (left) and KO (right) PCs, arrow  
892 indicates CF stimulation. Each trace consists of 10 overlaid traces (lighter color) and the  
893 corresponding CpS average (dark color). (B) Average number of spikelets per CpS in WT  
894 and KO PCs; \*\* $p < 0.01$  (Mann-Whitney). (C) Percentage of spikelets exceeding 30 mV  
895 trough-to-peak amplitude, ordered by spikelet number. (D) Average CpS initial spike  
896 amplitude;  $p = 0.89$  (NS). (E) Average PC membrane potential when in zero current  
897 mode;  $p = 0.60$  (NS). (F) Representative single traces of membrane voltage responses to  
898 current injection, showing steps of 0, 100, 200 pA injections from  $V_m = -60$  mV; *Left* WT  
899 (black); *Right* KO (green). Average  $I_{\text{step}}$  to initiate spiking WT =  $200 \pm 39$  pA,  $n = 10$ ;  
900 KO =  $289 \pm 82$  pA,  $n = 9$ ;  $p = 0.33$  (NS). (G) Average spike count during current steps  
901 from -0.2 to 1 nA,  $V_m = -60$  mV. WT (black) and KO (green);  $p = 0.63$  (NS; Two-way  
902 ANOVA with repeated measures,  $F_{(1, 19)} = 0.23$ ). Data shown  $\pm$  SEM,  $n =$  cells; unpaired  
903 Student's t-test unless otherwise indicated.

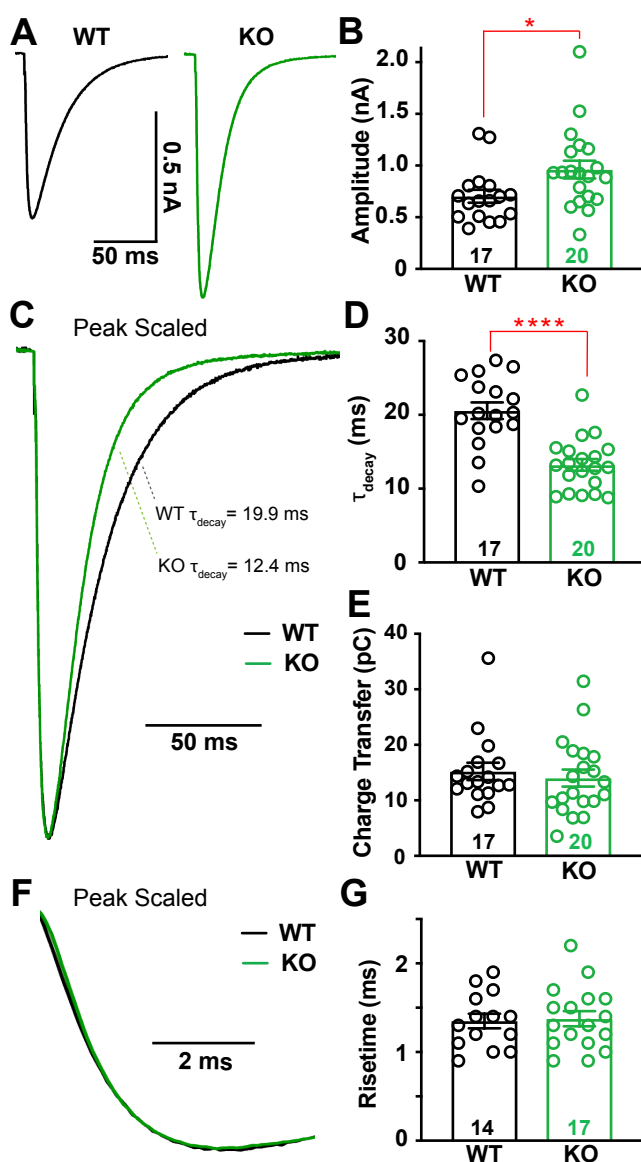

904

905 **Figure 2 CF-evoked EPSCs are larger and faster in *Cacna2d2* KO mice, but total**

906 **charge transfer is conserved.**

907

908 (A) Representative CF-evoked EPSCs. *Left* WT average (black); *Right* KO average

909 (green). (B) Average peak CF EPSC amplitude; \* $p < 0.05$ . (C) Peak scaled EPSCs,

910 demonstrating the relative decay time constants for these example traces ( $\tau_{\text{decay}}$ ) based on

911 single exponential fits; WT (black) and KO (green). (D)  $\tau_{\text{decay}}$  (ms) for CF EPSCs in WT

912 vs. KO PCs; \*\*\*\*  $p < 0.0001$ . (E) Average charge transfer within the first 100 ms of  
913 EPSC;  $p = 0.58$  (NS). (F) Peak scaled EPSCs, expanded to display risetime kinetics; WT  
914 (black) and KO (green). (G) Average CF EPSC 20-80% risetime (ms);  $p = 0.83$  (NS).  
915 Data shown  $\pm$  SEM,  $n =$  cells; unpaired Student's t-test.

916

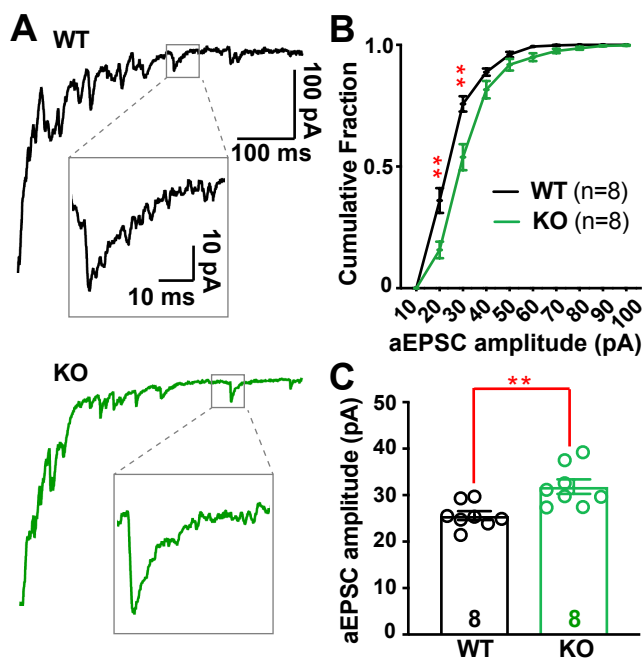

917

918 **Figure 3** *Desynchronized CF-evoked vesicle release reveals larger quantal responses in*

919 *Cacna2d2 KO.*

920

921 (A) Representative CF-evoked EPSCs in the presence of 1.3 mM  $Sr^{2+}$ ; *Top* WT EPSC

922 (black) and example asynchronous EPSC (aEPSC; inset); *Bottom* KO EPSC (green) and

923 aEPSC (inset). (B) Cumulative aEPSC amplitude distribution graphed in 10 pA bins; WT

924 (black) and KO (green); \*\* $p < 0.01$  for 20 and 30 pA bins, all others NS (Multiple t-tests

925 with Holm-Sidak correction for multiple comparisons). (C) Average aEPSC amplitudes;

926 \*\* $p < 0.01$ . Data shown  $\pm$  SEM,  $n =$  cells; unpaired Student's t-test.

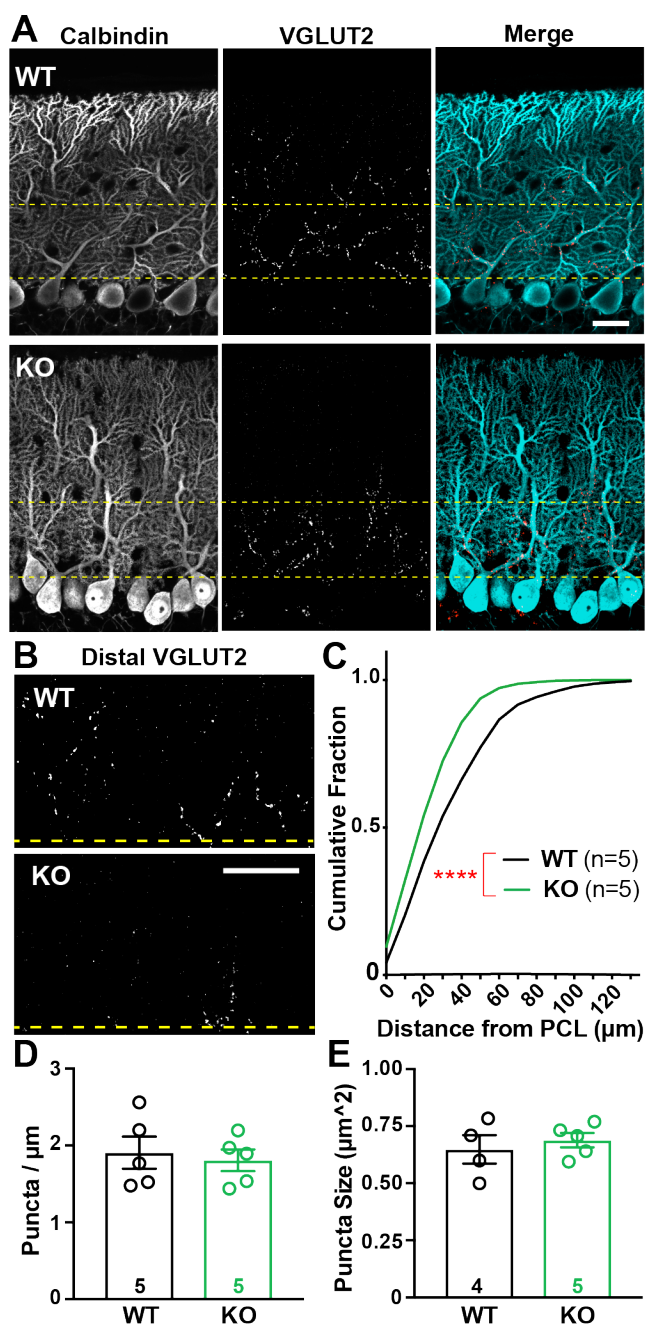

927

928 **Figure 4** *CF terminal distribution, but not number, is altered in Cacna2d2 KO*

929 *cerebellum.*

930

931 (A) Representative images from p21 WT (above) and KO (below) tissue, depicting the

932 Purkinje cell layer (PCL). Calbindin (left/blue in merge) marks PCs, while VGLUT2

933 immunoreactivity (middle/red in merge) marks CF terminals. Yellow lines demarcate the  
934 50  $\mu\text{m}$  most proximal to PC somata and is the region most highly innervated by climbing  
935 fibers. Scale bar = 20  $\mu\text{m}$ . (B) VGLUT2-immunoreactive CF terminals in the outer  
936 molecular layer, cropped at the distal yellow line (50  $\mu\text{m}$ ), illustrate differences in CF  
937 innervation of distal PC dendrites in WT (top) and KO (below) PCs. Scale bar = 20  $\mu\text{m}$ .  
938 (C) Cumulative distribution of VGLUT2<sup>+</sup> puncta relative to PC somas in WT (black, n =  
939 5 animals) and KO (green, n = 5 animals); \*\*\*\*p < 0.0001 (Kolmogorov-Smirnov test).  
940 (D) Average VGLUT2<sup>+</sup> punctum size was not significantly different between WT and  
941 KO terminals; p = 0.55 (NS). (E) Average VGLUT2<sup>+</sup> puncta density per length of PCL  
942 (puncta/  $\mu\text{m}_{\text{PCL}}$ ) was not significantly different between WT and KO; p = 0.72 (NS).  
943 Unless otherwise stated, data shown  $\pm$  SEM, n = animal; unpaired Student's t-test.



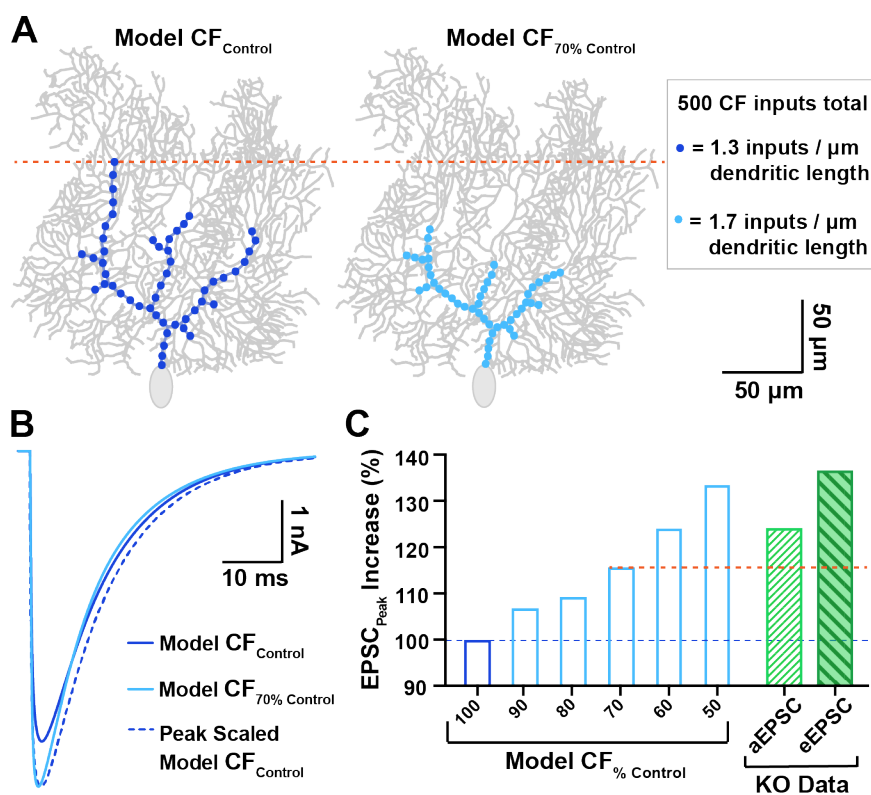

944

945 **Figure 5 Computational PC model simulates the impact of proximally shifted CF**  
 946 **inputs on EPSC waveform.**

947

948 (A) Left Model CF input distribution similar to control PCs (dark blue; “Model CF<sub>Control</sub>”)  
 949 vs. a similar PC with CF inputs shifted 30% more proximal (right, light blue, “Model  
 950 CF<sub>70% Control</sub>”), which matches the degree of proximal shift in WT vs. KO innervation,  
 951 respectively. All models conserved the total number of CF quantal inputs (500 inputs  
 952 with 1 nS conductance), though input density was adjusted to accommodate the shortened  
 953 region of CF innervation (see inset). (B) Overlay of EPSC output waveforms from Model  
 954 CF<sub>Control</sub> simulations (dark blue; 4.7 nA), Model CF<sub>70% Control</sub> (light blue; 5.4 nA), and  
 955 peak scaled Model CF<sub>Control</sub> to compare decay kinetics. For tau of decay; Model CF<sub>Control</sub>  
 956  $\tau_{\text{decay}} = 12.0$  ms; Model CF<sub>70% Control</sub>  $\tau_{\text{decay}} = 10.2$  ms). (C) Predicted increase in EPSC

957 peak amplitude for various degrees of proximally shifted Model CFs (light blue bars,  
958 restricted to a zone 100-50% the width of control CFs, all including 500 quantal inputs)  
959 compared to Model CF<sub>Control</sub> (dark blue bar). For comparison, the empirically determined  
960 increase in quantal EPSC (aEPSC; hatched green bar) and evoked EPSC (eEPSC; filled-  
961 hatched dark green bar) amplitudes in KO PCs are also displayed (derived from Figures 3  
962 and 2, respectively). The orange dotted line demarcates the predicted EPSC increase from  
963 the model based on the observed shift in CF location.

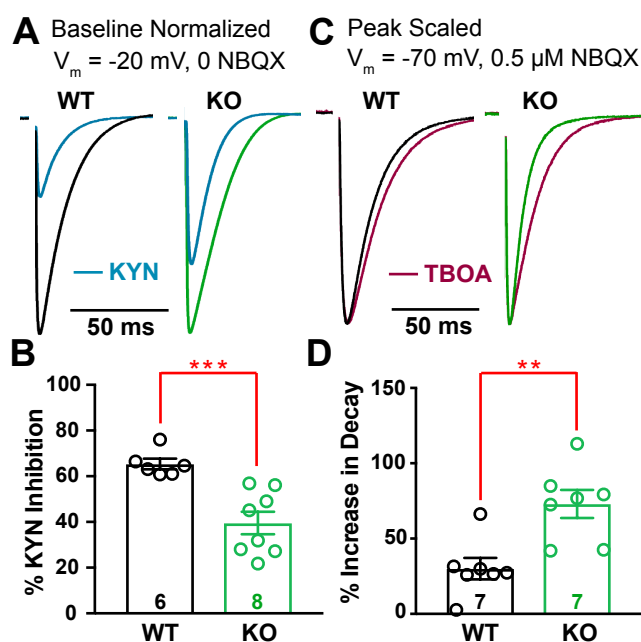

964

965 **Figure 6** *Cacna2d2* KO has increased glutamate release and clearance at CF-PC

966 *synapses.*

967

968 (A) Representative CF EPSCs recorded at  $V_m = -20$  mV in the absence of NBQX for WT  
969 and KO PCs (relative scales; WT = black; KO = green). For each, traces after exposure to  
970 1 mM kynurenic acid (KYN; blue) are shown normalized to baseline EPSC amplitudes.

971 (B) Percent inhibition of EPSC peak amplitude by KYN; \*\*\* $p < 0.001$ . (C)

972 Representative normalized CF-evoked EPSCs recorded at  $V_m = -70$  mV in the presence  
973 of 0.5  $\mu$ M NBQX; *Left* WT average (black); *Right* KO average (green). Overlay average  
974 peak-scaled traces after exposure to 50  $\mu$ M DL-TBOA (TBOA; magenta). (D) Average

975 increase in EPSC decay by TBOA; \*\* $p < 0.01$ . Data shown  $\pm$  SEM,  $n =$  cells; unpaired

976 Student's t-test.

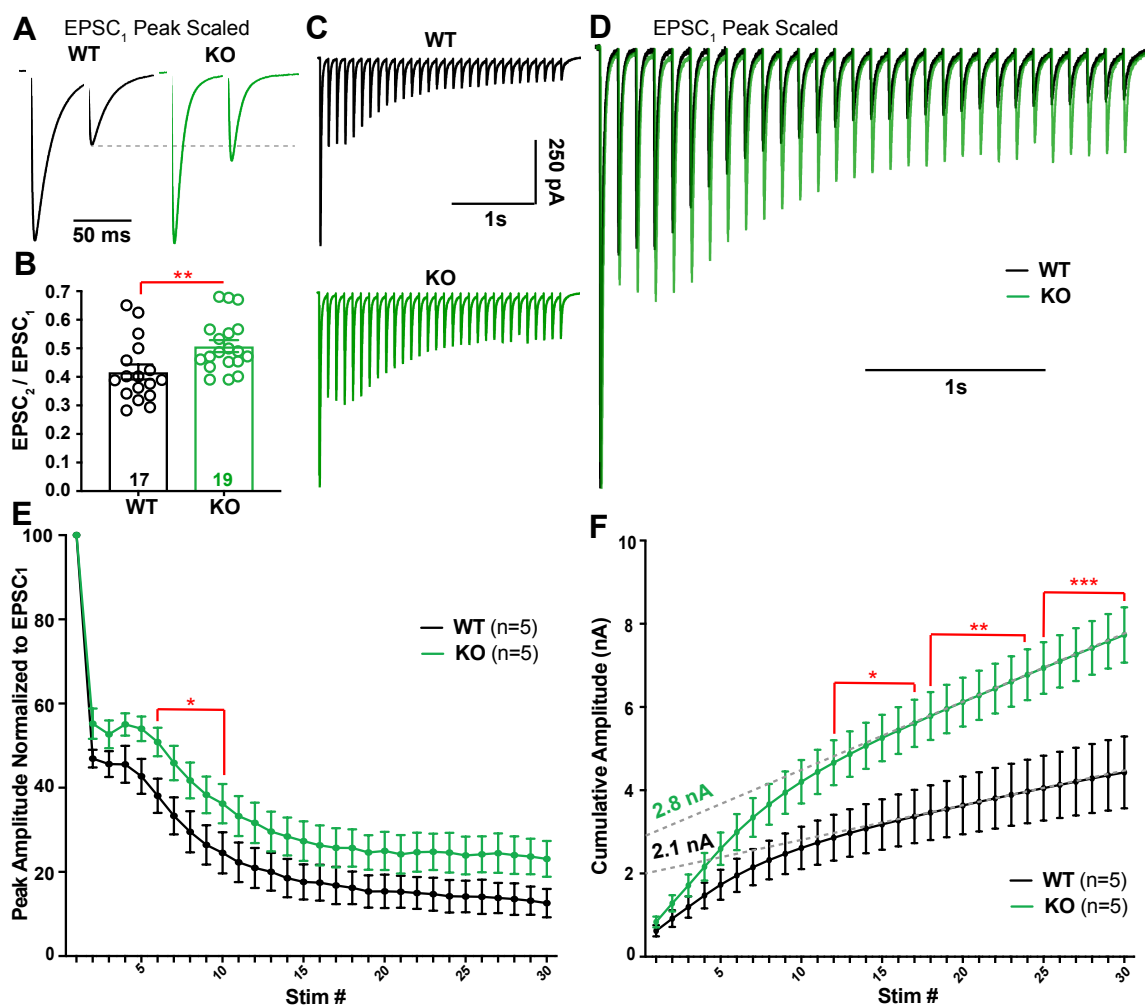

977

978 **Figure 7 Repetitive stimulation of CF synapses reveals a lower probability of release**  
979 **and greater cumulative release in *Cacna2d2* KO.**

980

981 A) Representative traces from WT (black) and KO (green) PCs during 50 ms paired-pulse  
982 stimulation. Traces are scaled to the first EPSC (EPSC<sub>1</sub>). Dotted gray line shows paired-  
983 pulse depression of the second EPSC (EPSC<sub>2</sub>) in WT compared to KO. (B) Average  
984 paired-pulse ratio (EPSC<sub>2</sub>/EPSC<sub>1</sub>); \*\* p < 0.01. (C) Representative traces in response to  
985 10 Hz stimulation; WT (black); KO (green). (D) Traces from (C) peak scaled to EPSC<sub>1</sub>  
986 and overlaid, illustrating different relative steady-state EPSC amplitudes during latter

987 portions of the train. (E) Summary data of EPSC amplitudes normalized to EPSC<sub>1</sub> during  
988 10 Hz stimulation in WT (black) and KO (green). \* $p < 0.05$  (Multiple t-tests with Holm-  
989 Sidak correction). (F) EPSC amplitudes during 10 Hz stimulation plotted as cumulative  
990 amplitude from WT (black) and KO (green). For comparison of cumulative amplitude  
991 between WT and KO at various stimulation numbers (stim #); \*  $p < 0.05$ , \*\*  $p < 0.01$ ,  
992 \*\*\*  $p < 0.001$  (Multiple t-tests with Holm-Sidak correction). Dotted grey lines illustrate a  
993 linear fit to cumulative amplitude between stim # 20-30 from WT and KO trains. Data  
994 shown  $\pm$  SEM,  $n$  = cells; unpaired Student's t-test unless otherwise indicated.

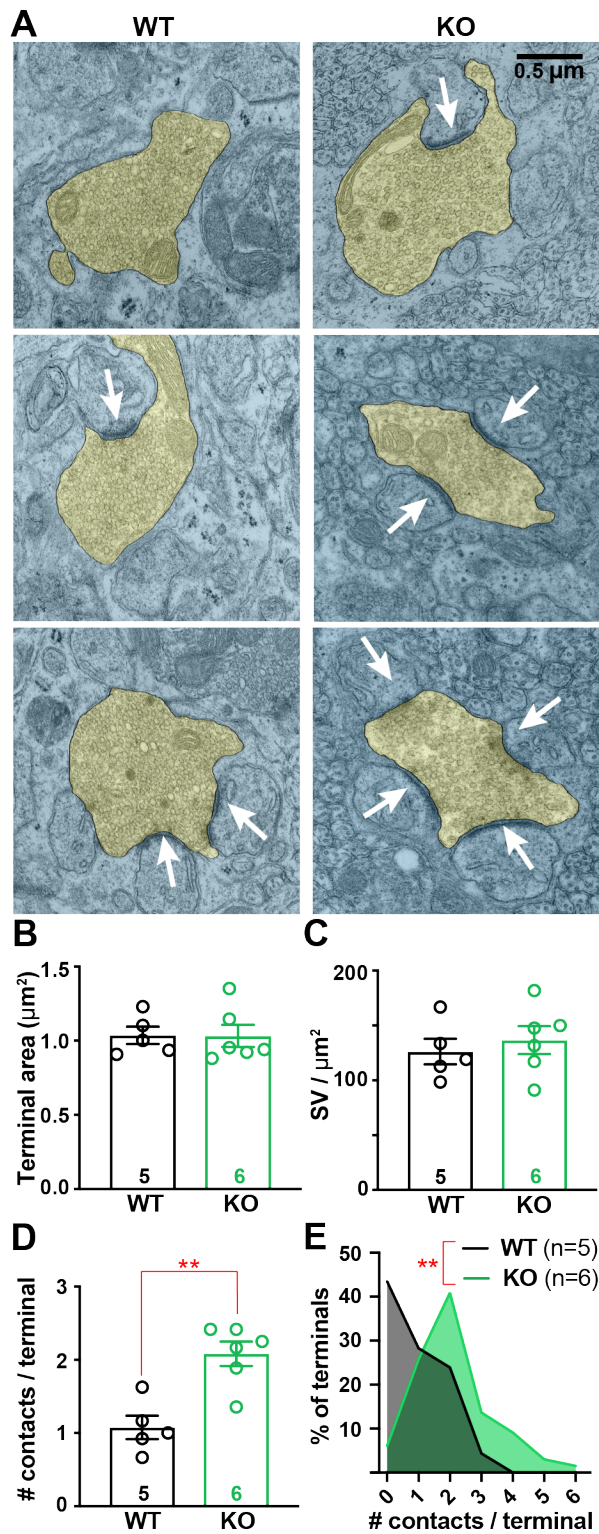

995

996 **Figure 8 CF terminals have increased numbers of synaptic contacts in *Cacna2d2* KO**

997 *animals.*

998  
999 (A) Representative transmission electron micrographs of CF terminals (pseudocolored  
1000 yellow) from p21 WT (left) and KO (right) animals. White arrows indicate postsynaptic  
1001 densities used to quantify synaptic contacts/terminal. Scale bar = 0.5  $\mu\text{m}$ . (B) Average CF  
1002 terminal area ( $\mu\text{m}^2$ );  $p = 0.55$  (NS). (C) Synaptic vesicle (SV) density (SV/  $\mu\text{m}^2$ ) was not  
1003 different between WT and KO animals;  $p = 0.57$  (NS). (D) Average number of contacts  
1004 per CF terminal (# contacts/terminal) was increased in KO animals. \*\*  $p < 0.01$  (Mann-  
1005 Whitney test). (E) Histogram of all CFs analyzed from WT (black) and KO (green)  
1006 cerebelli, displaying the number of contacts per sampled CF terminal normalized to total  
1007 number of CF terminals;  $p < 0.01$  (Kolmogorov-Smirnov test). Data shown  $\pm$  SEM,  $n =$   
1008 animals using 15-20 images/animal; unpaired Student's t-test unless otherwise stated.

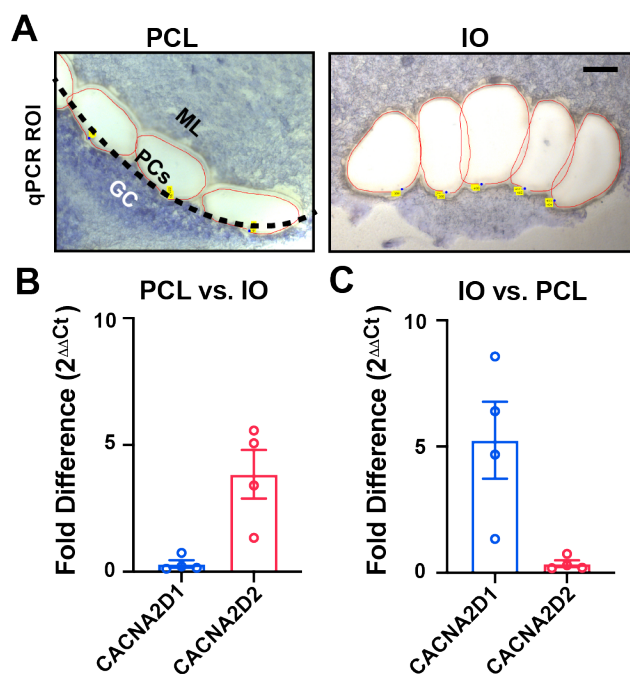

1009

1010 **Figure 9** *Relative expression of Cacna2d transcripts by qPCR from Purkinje cell layer*  
1011 *and inferior olive tissues.*

1012

1013 (A) Example Purkinje cell layer (PCL) and inferior olive (IO) regions of interest isolated  
1014 by laser capture microdissection from fresh-frozen WT tissue. *Left, PCL region of*  
1015 *interest; black-dotted line indicates the monolayer of PCs that have been dissected along*  
1016 *with regions of the inner molecular layer (ML; granule cells, GC). Right, IO region of*  
1017 *interest; one hemisphere from a coronal section of ventral brainstem, scale = 100  $\mu$ m.*

1018 (B,C) Fold difference ( $2^{-\Delta\Delta Ct}$ ) expression of *Cacna2d* isoforms by quantitative PCR  
1019 comparing (B) PCL vs. IO, and (C) IO vs. PCL samples. Data shown  $\pm$  SEM, n = 4  
1020 animals.



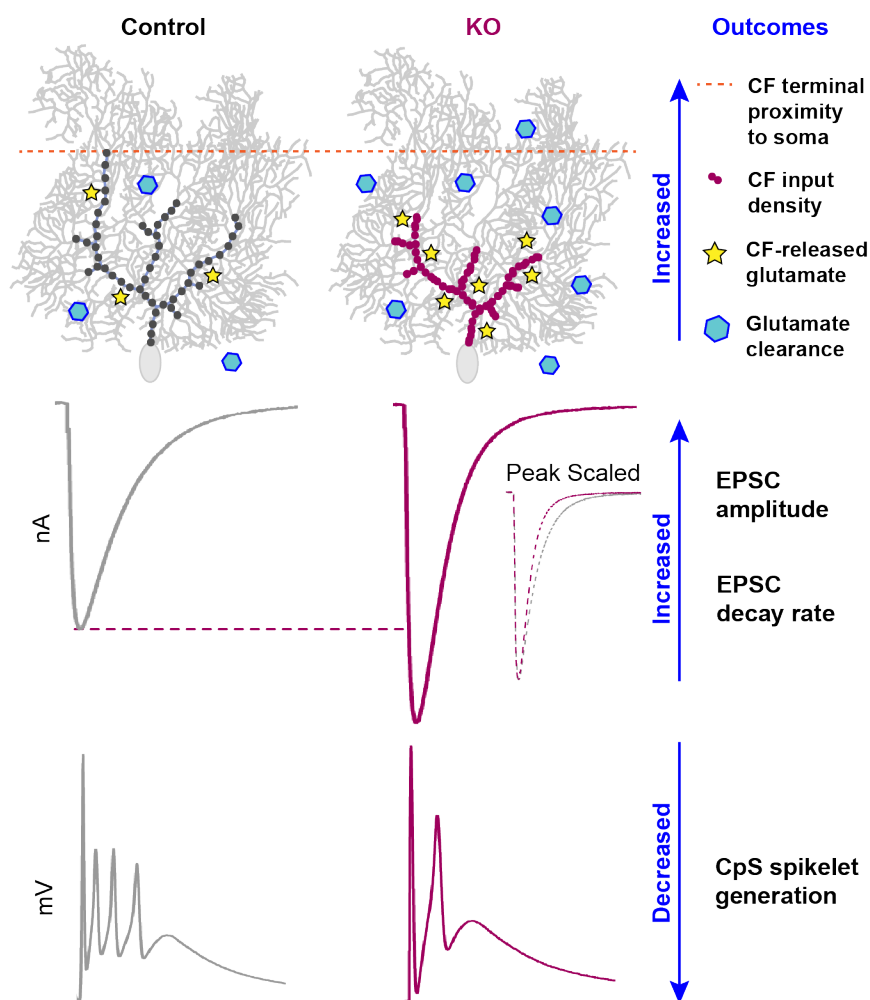

1021

1022 **Figure 10 Summary of CF-PC phenotypes in *Cacna2d2* KO mice.**

1023

1024 Proximal distribution of CF inputs onto KO Purkinje cells enhanced postsynaptic quantal  
1025 responses to CF glutamate release, and the increased number of synaptic release sites  
1026 increased total glutamate concentration. Together, this resulted in a 140% EPSC  
1027 amplitude in the KO compared to control. Counteracting effects included a lower CF  $P_R$   
1028 and enhanced glutamate clearance, which doubled the EPSC decay rate. Ultimately,  
1029 larger synaptic conductances in the KO likely contribute to depolarization block of CF-  
1030 evoked spikelet generation.
